1 **The immunomodulatory CEA cell adhesion molecule 6 (CEACAM6/CD66c) is a**  
2 **candidate receptor for the influenza A virus**

3 Shah Kamranur Rahman<sup>a\*</sup>, Mairaj Ahmed Ansari<sup>b</sup>, Pratibha Gaur<sup>c</sup>, Imtiyaz Ahmad<sup>a</sup>,  
4 Chandrani Chakravarty<sup>a,d</sup>, Dileep Kumar Verma<sup>a</sup>, Sanjay Chhibber<sup>e</sup>, Naila Nehal<sup>f</sup>,  
5 Shanmugaapriya Sellathanby<sup>d</sup>, Dagmar Wirth<sup>c</sup>, Gulam Waris<sup>b</sup> and Sunil K. Lal<sup>a,g</sup> #

6  
7 Virology Group, International Centre for Genetic Engineering & Biotechnology, New Delhi,  
8 India<sup>a</sup>.

9 Department of Microbiology and Immunology, H. M. Blich Cancer Research Laboratories,  
10 Rosalind Franklin University of Medicine and Science, Chicago Medical School, North  
11 Chicago, Illinois, USA<sup>b</sup>.

12 Helmholtz Centre for Infection Research, Braunschweig, Germany<sup>c</sup>.

13 Department of Biomedical Science, Bharathidasan University, Trichy, India<sup>d</sup>.

14 Microbiology Department, Panjab University, Chandigarh, India<sup>e</sup>.

15 Career Institute of Medical & Dental Sciences and Hospital, Lucknow, India<sup>f</sup>.

16 School of Science, Monash University, Selangor DE, Malaysia<sup>g</sup>.

17

18 Running Head: Protein receptor for Influenza A Virus

19

20 # Corresponding author: Professor of Microbiology, School of Science, Monash University,  
21 47500 Bandar Sunway, Selangor DE, Malaysia.

22 Email: [sunil.lal@monash.edu](mailto:sunil.lal@monash.edu); Telephone: (+603) 551 59606

23

24 \* Current address: Department of Pathogen Molecular Biology, London School of Hygiene &  
25 Tropical Medicine, Keppel Street, London WC1E 7HT, United Kingdom.

26

## 27 **Abstract**

28 To establish a productive infection in host cells, viruses often use one or multiple host  
29 membrane glycoprotein as their receptors. For Influenza A virus (IAV) such a glycoprotein  
30 receptor has not been described, to date. Here we show that IAV is using the host membrane  
31 glycoprotein CD66c as a receptor for entry into human epithelial lung cells. Neuraminidase  
32 (NA), a viral spike protein binds to CD66c on the cell surface during IAV entry into the host  
33 cells. Lung cells overexpressing CD66c showed an increase in virus binding and subsequent  
34 entry into the cell. Upon comparison, CD66c demonstrated higher binding capacity than other  
35 membrane glycoproteins (EGFR and DC-SIGN) reported earlier to facilitate IAV entry into  
36 host cells. siRNA mediated knockdown of CD66c from lung cells inhibited virus binding on  
37 cell surface and entry into cells. Blocking CD66c by antibody on the cell surface resulted in  
38 decreased virus entry. We found CD66c is a specific glycoprotein receptor for influenza A  
39 virus that did not affect entry of non-IAV RNA virus (Hepatitis C virus). Finally, IAV pre-  
40 incubated with recombinant CD66c protein when administered intranasally in mice showed  
41 decreased cytopathic effects in mice lungs. This publication is the first to report CD66c  
42 (CEACAM6) as a glycoprotein receptor for Influenza A virus.

43

## 44 **Significance Statement**

45 Cells are enclosed by a semipermeable membrane that allows selective exchange of  
46 biomolecules between cells and their surroundings. A set of specialized proteins in this  
47 semipermeable membrane, work like gatekeepers to the cell and regulate entry of these  
48 biomolecules. One class of such surface proteins is termed as receptors. Viruses bind to  
49 one or more of these receptors and manipulate gatekeepers for their own successful entry  
50 into host-cells. A membrane protein that influenza A virus (Flu virus) uses for entry into  
51 the cells was not discovered till date. This study reports for the first time, a receptor for

52 influenza A virus, that was sought after by researchers for decades. The viral receptor is a  
53 promising target that can be used to inhibit virus entry into host cells.

54

## 55 **Introduction**

56 The outermost surface of mammalian cells typically bear a covering of branched sugar residues  
57 (oligosaccharides) that allow a wide range of interactions with different biomolecules  
58 (hormones, cytokines, growth factors etc.) of the matrix (1). These oligosaccharides are often  
59 linked to membrane proteins (glycoproteins) or lipid (gangliosides) at the cell surface. The type  
60 of sugar residues and their branching is responsible in deciding specificity of oligosaccharides  
61 towards biomolecules coming in contact with the cell surface. This interactions between  
62 oligosaccharides and biomolecules play a diverse physiological role and are important in  
63 maintaining communication and transport of molecules, between the cell and its surroundings  
64 (2). Many of these oligosaccharide chains bear sialic acid (SIA) at the termini, which serve as a  
65 regulators of molecular and cellular interactions (3).

66 In general, viruses often breach this communication and bind to terminal SIA as the first  
67 step to invade cells (4). This less specific interaction of viruses with terminal SIA is followed  
68 by a more specific interaction of viral spike proteins with a subset of host glycoprotein  
69 receptors that effectively accompany the virus into cells and drive the ingested cargo to  
70 destined endocytic pathways or intracellular routings (5).

71 The mechanism of Influenza A Virus (IAV) entry still remains elusive. Information on a  
72 host glycoprotein receptor that can pull virus into the cell is largely unknown. Most of the  
73 published literature on influenza entry are centric to the early attachment factor viz.  
74 oligosaccharides. The importance of the role of SIA in IAV entry has been documented as early  
75 as 1959 (6) however, there are reports showing IAV entry into host cells even in the absence of  
76 SIA (7, 8, 9). Interestingly, De Vries *et. al.* and Chu *et. al.* in their studies suggested that while  
77 SIAs ( $\alpha 2-6$ ,  $\alpha 2-3$ ) may help in the attachment of virus, a specific subset of glycoprotein

78 receptor is necessary for virus entry which is yet unidentified (8, 9). Over the years, a few  
79 membrane glycoproteins like EGFR (epidermal growth factor receptor), L-SIGN (liver/lymph  
80 node-specific intracellular adhesion molecules-3 grabbing non-integrin) and DC-SIGN  
81 (Dendritic Cell-Specific Intercellular adhesion molecule-3-Grabbing Non-integrin) were  
82 reported to facilitate viral attachment and entry but were not designated as a receptor for IAV  
83 possibly due to lack of evidence that they play a major role in IAV uptake (7, 10). Moreover,  
84 the evidence of their physical interaction with IAV spike proteins, Hemagglutinin (HA) and  
85 Neuraminidase (NA), at the cell surface or inside the cell was not well characterised. Generally,  
86 the role of glycoproteins EGFR, L-SIGN and DC-SIGN in the cellular uptake of virus is  
87 believed to be a low-specificity phenomenon since these surface proteins facilitate uptake of a  
88 number of viruses (11). Also, a comparative study showing specificity of these glycoproteins  
89 towards IAV and not other viruses was not demonstrated.

90 In this report, we have identified a glycoprotein receptor for IAV entry into lung  
91 epithelial cells. Earlier, we published a detailed account of an interaction between NA and a  
92 host membrane glycoprotein CD66c, validated for a variety of different IAV isolates (12). We  
93 now report CD66c as the first glycoprotein receptor candidate for IAV entry into host cells.  
94 CD66c aka Carcinoembryonic Cell Adhesion Molecule 6 (CEACAM6) is a GPI-anchored, raft  
95 associated, highly sialylated membrane glycoprotein of the immunoglobulin superfamily (IgSF).

96 To systematically validate CD66c as a receptor, we overexpressed this molecule on the  
97 surface of human lung cells and studied IAV binding and entry. Cells overexpressing CD66c  
98 on cell surface showed an increase in virus binding on the cell surface and subsequently  
99 increased entry into cells. Besides lung cell line (A549), the effect of CD66c on virus entry was  
100 further tested in mouse fibroblasts cells (NIH3T3), chinese hamster ovary cells (Lec2 CHO)  
101 and human embryonic kidney cells (HEK293). On the contrary, when CD66c expression levels  
102 were reduced by siRNA-mediated knockdown, we observed a significant decrease in viral  
103 binding and entry into lung cells. To further investigate the role of interaction, between viral

104 NA and host CD66c at the cell-surface, in virus entry, we performed antibody-mediated-  
105 receptor-blockade experiment. For this experiment, surface receptor CD66c was masked by  
106 incubating a monolayer of A549 lung cells with anti-CD66c monoclonal antibody (mAb) prior  
107 to virus binding to this monolayer. Masking of receptor CD66c by antibody inhibited virus  
108 entry probably due to a restricted interaction between the viral spike NA and putative receptor  
109 CD66c. Having validated CD66c as a receptor for IAV, it was important to compare the  
110 binding capacity of CD66c, towards virus binding and entry, with respect to other host  
111 glycoproteins (EGFR, DC-SIGN) that had been reported to facilitate virus binding and entry (7,  
112 10). We noticed, a significant increase in virus binding and entry into lung cells overexpressing  
113 CD66c however cells overexpressing EGFR, DC-SIGN showed a modest increase in virus  
114 binding and entry, under similar experimental conditions. We also found that overexpression of  
115 CD66c did not affect the expression levels of EGFR, DC-SIGN and vice versa. Additionally,  
116 we carried out an important experiment to validate CD66c as a specific receptor for the  
117 influenza virus. While glycoprotein CD66c was found necessary for the uptake of influenza  
118 virus by cells, it did not affect the entry of another non-IAV RNA virus (Hepatitis C virus).  
119 Finally, to confirm our hypothesis, we pre-incubated IAV particles with biologically active  
120 human recombinant CD66c protein (expressed in mouse myeloma cell line) prior to infecting  
121 BALB/c mice. Interestingly, we observed a significant decrease in infection and cytopathic  
122 effects in mice lungs presumably due to masking of the NA spike protein with rCD66c protein.

123 This study on identification of CD66c as a receptor for the influenza A virus has  
124 potential to further our knowledge on the mechanism of virus entry. Additionally, this  
125 newfound receptor brings to attention a new target for anti-viral interventions. Since CD66c is  
126 also an active immunomodulatory molecule (present on T cells, B cells and neutrophils) this  
127 finding may lead to exploration of early immunomodulatory events associated with the  
128 interaction between viral NA and CD66c.

129

## 130 **Results**

### 131 **Overexpression of CD66c on human lung cell surface resulted in increased virus binding**

132 The physical interaction between influenza NA and CD66c of virus-infected cells was  
133 confirmed earlier by co-immunoprecipitation assays (12). Here, we performed experiments to  
134 quantify virus binding on the surface of cells overexpressing CD66c glycoproteins. A549 lung  
135 cells transiently transfected with untagged CD66c gene showed a rise in the expression of this  
136 molecule at the host cell surface when monitored by flow cytometry (**Figure 1a**). Further, lung  
137 cells overexpressing CD66c showed significantly increased virus binding on cell surface.  
138 Increase in virus binding was detected by quantitatively probing NA, on the host cell surface.  
139 Our results showed an increase in viral NA on the surface of CD66c overexpressing cells,  
140 indicating higher virus binding (**Figure 1b**). Flow cytometry results showed that among cells  
141 with endogenous level of CD66c, ~18% of the total cell population had virus bound to cell  
142 surface. In contrast, CD66c overexpressing cells showed that approximately 80% of total cell  
143 population had virus bound to the cell surface (**Figure 1b**). We further carried out experiments  
144 to investigate whether the NA present on virus envelope colocalized with the putative receptor  
145 CD66c at the cell surface. For this experiment, we let IAV bind over a monolayer of human  
146 lung cells and subsequently stained cells with a mixture of two antibodies, anti-NA and anti-  
147 CD66c. Confocal microscopy revealed colocalization of CD66c with viral NA at the cell  
148 surface (**Figure 1c**). The CD66c (red) and viral NA (green) bound to the cell surface were  
149 clearly visible on merged view (yellow) (**Figure 1c**).

150

### 151 **Cells overexpressing CD66c showed increased virus entry**

152 We further sought to determine if CD66c overexpression in host cells increased virus entry. We  
153 quantified mRNA levels of viral NP and M1 after harvesting PR8 infected A549 lung cells,  
154 approximately 8 hours post-infection, h.p.i (one life cycle). Cells overexpressing CD66c  
155 showed 6-8 fold increase in the levels of M1 and NP mRNA (**Figure 2a, b**). We also measured

156 viral NP protein in CD66c expressing A549 cells that showed 7 fold increase in its expression  
157 levels (**Figure 2c-f**). To demonstrate that the NA-CD66c interaction affected virus entry in  
158 other types of cells as well, we performed similar experiments using the mouse embryonic  
159 fibroblast cell line NIH3T3. CD66c expressing NIH3T3 cells (NIH3T3-CD66c cells) showed  
160 an increase in NP mRNA levels as against the NIH3T3 cells (**Figure 3a**). Likewise we checked  
161 the virus binding and entry in CD66c overexpressing Lec2CHO cell lines. Lec2CHO cell lines  
162 transiently overexpressing CD66c favored virus binding on cell surface and subsequent uptake  
163 of the virus into cells (**Figure 3b, c**). HEK cells overexpressing CD66c cells showed an  
164 increase in virus entry, which was monitored by increase in the NP mRNA levels (**Figure 3d**).

165

166 **siRNA knockdown of CD66c inhibited virus binding on cell surface and subsequent entry**  
167 **into lung cells**

168 After having conducted overexpression studies with CD66c, we carried out siRNA  
169 experiments to silence the expression of this molecule and subsequently studied virus binding  
170 and entry into lung epithelial cells. For virus binding experiments cells incubated with virus for  
171 a brief period of 5 minutes were stained extracellularly for receptor CD66c (green) and  
172 Neuraminidase (red) and observed under fluorescent microscope. We found that siRNA  
173 mediated knockdown of CD66c expression in A549 lung cells resulted in the inhibition of virus  
174 binding on the cell surface (**Figure 4a**). Cells treated with CD66c siRNA showed poor  
175 expression of CD66c as shown by a weak green signal in uninfected cells (UI) and 5 minutes  
176 post-infected cells (5'), as against control siRNA treated cells (**Figure 4a**). Also, virus binding  
177 was not observed on the surface of cells silenced for CD66c, as observed by a reduced red  
178 signal for neuraminidase (Lower two panels, **Figure 4a**). In contrast, mock siRNA treated cells  
179 showed significant endogenous expression levels of CD66c (green) both in viral infected (5')  
180 and uninfected cells (UI). As expected, these cells upon infection showed significant viral  
181 binding on the cell surface, which was probed by viral NA (red). Accordingly, these cells

182 showed significant colocalization of NA (red) with CD66c (green) in merged fields (yellow)  
183 (**Figure 4a**). Altogether, we observed that cells with endogenous level of CD66c showed  
184 significant virus binding at the cell surface however cells silenced for CD66c did not show any  
185 visible virus binding on the cell surface due to absence of surface receptor CD66c (**Figure 4a**).  
186 To validate our immunofluorescence assay (IFA) data we performed a western blot analysis to  
187 study the effect of siRNA-mediated-silencing of CD66c in virus entry (**Figure 4b**). The siRNA  
188 treated lung cells that showed complete loss of CD66c expression, consequently demonstrated  
189 inhibition of viral infection as was evident from poor expression of the viral protein NP  
190 (**Figure 4b**). Additionally, using western blot analysis, effect of CD66c silencing on expression  
191 levels of membrane protein EGFR and DC-SIGN were evaluated. We found that siRNA  
192 mediated silencing of CD66c did not suppress the expression of EGFR and DC-SIGN (**Figure**  
193 **4b**). More importantly this data also suggested that expression of CD66c in A549 lung cells did  
194 not have any effect on the expression levels of EGFR and DC-SIGN.

#### 195 196 **Antibody-mediated masking of receptor CD66c at cell surface inhibited virus entry**

197 From our previous publication, it was established that NA interacts with CD66c inside the host  
198 cell and overexpression of CD66c influenced cell survival pathways (PI3K-Akt), with  
199 subsequent increase in viral load in infected cells (12). In that context, here a decrease in viral  
200 load in cells knocked down for CD66c (**Figure 4a**) may be implicated due to a corresponding  
201 down modulation of cell survival pathway (PI3K-Akt). Therefore this result (**Figure 4a**) is not  
202 sufficient to claim CD66c is a receptor. To validate CD66c is a receptor for viral entry, we need  
203 evidence to demonstrate effect of direct interaction, between CD66c and NA at the host cell  
204 surface, in virus entry. Therefore, we conducted the receptor-blockade experiment. An  
205 experiment demonstrating that a disruption of physical interaction between host CD66c and  
206 viral NA at the cell surface could affect viral entry. Initially, we performed antibody-mediated  
207 receptor blockade experiments on CD66c overexpressing NIH3T3 (NIH3T3-CD66c) cells. For



208 this experiment, a monolayer of NIH3T3-CD66c cells when treated with mAb anti-CD66c at  
209 increasing concentrations of 1.0 $\mu$ g/mL, 1.5 $\mu$ g/mL, 2.0 $\mu$ g/mL and 8.0 $\mu$ g/mL, preceding virus  
210 infection. This experiment revealed significant decrease in virus infection in a dose dependent  
211 manner. The virus entry levels in these cells were determined by the mRNA levels of viral NP  
212 (**Figure 5a**). Likewise inhibition of virus entry was observed by determining expression levels  
213 of viral NP protein in NIH3T3-CD66c cells, when treated with increasing concentrations of  
214 anti-CD66c mAb prior to infection (**Figure 5b**). From these results, lower levels of NP (mRNA  
215 and protein) in anti-CD66c mAb treated cells suggested that masking of CD66c on host cell  
216 surface by mAb reduced its access to NA spike protein present on the envelope of the infecting  
217 virus particles thus inhibiting virus binding and uptake. For conclusive validation of our  
218 hypothesis, we finally performed mAb mediated receptor blockade experiment in A549 lung  
219 cells with endogenous (not overexpressed) levels of CD66c on the cell surface. In a control  
220 experiment we also tested the effect of mock antibody (IgG isotype) binding on the A549 cell  
221 monolayer as against CD66c binding (**Figure 6a, b**). We observed a corresponding decrease in  
222 virus entry when cells were treated with mAb anti-CD66c at the respective concentrations of  
223 1.0  $\mu$ g/mL, 1.5 $\mu$ g/mL, 2.0 $\mu$ g/mL, 4.0 $\mu$ g/mL and 8.0  $\mu$ g/mL (**Figure 6c**). Inhibition of virus  
224 entry was demonstrated by measuring a corresponding reduction in expression levels of viral  
225 NP protein in infected cells by flow cytometry (**Figure 6d-g**). The dose dependence of mAb  
226 anti-CD66c in the inhibition of viral entry was also confirmed by quantitating another viral  
227 protein, M1 in the corresponding cells (**Figure 6h, i**). One set of the antibody mediated receptor  
228 blockade experiment was also studied under confocal microscopy, which showed similar  
229 inhibition of virus entry into A549 cells that were treated with 4.0  $\mu$ g/mL of anti-CD66c mAb  
230 (**Figure 6j**).

231

232 **Virus binding and entry in cells overexpressing CD66c, EGFR and DC-SIGN**

233 A few reports earlier showed that overexpression of two membrane proteins (EGFR and DC-  
234 SIGN) resulted an increase in virus binding and entry into mammalian cells. Therefore we  
235 conducted an experiment to compare virus binding and entry in cells overexpressing CD66c,  
236 EGFR and DC-SIGN respectively. For this experiment we checked the extent of virus binding  
237 on the lung cells, at the endogenous and overexpressed levels of these host membrane  
238 glycoproteins (EGFR, DC-SIGN and CD66c). We reasoned that a genuine receptor upon  
239 overexpression in lung cells should exhibit significant increase in virus binding on the cell  
240 surface, whereas a weak receptor candidate upon overexpression should display a modest  
241 increase in virus binding. After allowing IAV virus to bind to cell monolayers, we examined  
242 the cultures under a fluorescence microscope to monitor the membrane glycoproteins (green)  
243 and viral NA (red). We did not notice significant increase in virus binding on lung cells  
244 overexpressing EGFR as against cells with endogenous levels of EGFR (**Figure 7a**). Also, the  
245 viral spike protein NA (red) did not show possible colocalization with EGFR. Similarly, there  
246 was no significant increase in virus binding on lung cells overexpressing DC-SIGN as  
247 compared to cells with endogenous levels of DC-SIGN (**Figure 7b**). However, when we  
248 analyzed cells with endogenous level of receptor CD66c it showed significant virus binding  
249 (**Figure 7c**), the yellow signal in these cells suggested strong colocalization of NA (red) with  
250 receptor CD66c (green). Additionally, upon CD66c overexpression lung cells showed a further  
251 increase in virus binding on cells as against cells with endogenous CD66c level (**Figure 7c**)  
252 Altogether, the corresponding increase in yellow spots in cells overexpressing CD66c signifies  
253 the higher binding capacity of CD66c (green) towards Influenza A virus (NA) at the cell  
254 surface (**Figure 7c**) as compared to that of other two glycoproteins (EGFR and DC-SIGN).

255 An increase in virus binding to receptor leads to consequent virus entry into cells.  
256 Therefore, after virus binding experiments, we tested and compared ability of other two  
257 glycoproteins (EGFR and DC-SIGN) in virus entry with that of CD66c, at the same  
258 experimental conditions. We observed, CD66c overexpression in lung cells resulted significant

259 increase in virus entry as monitored by expression levels of viral NP inside cells (**Figure 8a**).  
260 In contrast, overexpression of DC-SIGN and EGFR did not show much change in virus entry,  
261 except for a modest increase in viral NP (**Figure 8b, 8c**). We also found that transient  
262 overexpression of CD66c did not affect the expression levels of glycoproteins EGFR and DC-  
263 SIGN (**Figure 8a**). Similarly, the overexpression of these two glycoproteins (DC-SIGN and  
264 EGFR) had no effect on CD66c expression (**Figure 8b, 8c**).

265

#### 266 **Absence of CD66c in cells showed no decrease in entry of non-IAV virus**

267 The membrane glycoprotein DC-SIGN has been documented to serve as a low-specificity virus  
268 receptor for IAV and is postulated to facilitate the entry of other viruses like HIV (Human  
269 immunodeficiency virus) and HCV (Hepatitis C virus) (11). Critically, we argued that CD66c  
270 being a membrane glycoprotein might also be expected to serve as a low-specificity receptor  
271 for viruses other than IAV. To this effect, we sought to establish the specificity of CD66c  
272 towards influenza virus against an unrelated RNA virus – HCV. We conducted these  
273 experiments in human hepatoma Huh cells that were siRNA-mediated-silenced for CD66c  
274 expression. We monitored HCV entry into these Huh cells by checking the expression levels of  
275 the HCV NS3 protein (**Figure 9**). This data clearly showed that the absence of CD66c in Huh  
276 cells had not inhibited entry of HCV, thus proving that CD66c was not a low-specificity  
277 general viral receptor.

278

#### 279 **Influenza virus incubated with CD66c showed reduction in alveolitis**

280 Since we had clearly shown that CD66c was capable of binding to the NA of IAV, we reasoned  
281 if we could use heterologously expressed recombinant CD66c protein to bind IAV particles,  
282 this should in principle bring down the infectivity of the virus in mice. Thus, we incubated 1µg  
283 of biologically active recombinant CD66c (rCD66c), that was produced in mouse myeloma cell  
284 lines, with  $7.4 \times 10^7$  PFU IAV before intranasal infection of BALB/c mice. After ten days of

285 infecting mice with virus through intranasal inoculation, we noticed a considerable reduction in  
286 alveolitis in the mice that were infected with rCD66c bound IAV (**Figure S1a**) as compared to  
287 mice treated with virus alone (**Figure S1b**) or virus incubated with protein control Bovine  
288 Serum Albumin (BSA) (**Figure S1c**). The insignificant inflammation in the lungs of mice  
289 infected with CD66c treated virus was comparable to the lung tissues from uninfected mice  
290 (**Figure S1d**). These results strongly suggest that binding of rCD66c to NA significantly  
291 reduces lung pathology of IAV infected BALB/c mice, thus confirming our belief that CD66c  
292 is a receptor for IAV. The incubation of 1 $\mu$ g of biologically active recombinant CD66c  
293 (rCD66c) with  $7.4 \times 10^7$  PFU IAV had shown inhibition of virus entry in human A549 lung  
294 cell line (Data not shown).

295

## 296 **Discussion**

297 In our search for a receptor for IAV, we chose to follow the experimental path followed by  
298 many other research groups to identify new viral receptors (13-20). We conducted similar  
299 experiments in detail, which could validate the interaction between viral NA and host CD66c at  
300 the outer cell surface, during IAV attachment and entry. The results thus obtained from these  
301 experiments provided sufficient evidence that suggested CD66c as the glycoprotein receptor for  
302 influenza virus. The validation of a protein receptor for influenza virus from this study provides  
303 valuable insights into some unresolved problems of influenza entry. For instance, it was cited in  
304 the earlier studies on influenza entry that although sialic acid was required for virus binding, a  
305 specific subset of glycoprotein receptors was necessary for effective viral entry (8, 9), which is  
306 yet unknown. Therefore, with the results presented here, we suggest that CD66c is at least one,  
307 of the possibly many, glycoprotein receptors. Additionally, this study may further lead to the  
308 discovery of other glycoprotein receptors or co-receptors playing a role in virus entry besides  
309 CD66c. The mechanism of virus entry is poorly understood and different alternative routes  
310 were suggested for IAV entry, such as clathrin-mediated endocytosis, non clathrin-mediated,

311 caveolin-mediated endocytosis or macropinocytosis (21-28). We believe, CD66c, as a receptor  
312 for the influenza virus will help in elucidating the precise route for virus-entry and pave the  
313 way for discovery of other co-receptors and their mechanism.

314 Further, with this finding we noticed that IAV follows an infection pattern that is  
315 similar to some other viruses wherein they take advantage of adhesive properties of hosts cell  
316 adhesion molecules (CAMs), for their attachment and entry. For example, Coronavirus, Rabies,  
317 Reovirus and Rhinovirus, employ the following cell adhesion molecules CEACAM1, NCAM-1,  
318 JAM-A, ICAM-1 respectively, as their receptor for cellular entry (13-15). Additionally, viruses  
319 often interact and utilize these cell adhesion molecules (CAMs) to foster a contact between  
320 infected and uninfected target cells for an effective cell-to-cell spread (29). Carcinoembryonic  
321 Cell Adhesion Molecule 6 (CEACAM6/CD66c) as the receptor for IAV opens opportunities for  
322 further investigations on cell-to-cell spread for this virus as well. Our result showing prominent  
323 NA-CD66c interaction at the site of cell-cell junction compared to the rest of the cellular  
324 membrane is a preliminary indication in that direction (**Figure 1c**).

325 Apart from cell adhesion other unique attributes of CD66c, such as GPI anchoring, lipid  
326 raft association and heavy glycosylation (Sialyl-Lewis<sup>X</sup>), make it a very suitable and strong  
327 receptor candidate for IAV entry. Influenza binding on the cell surface causes lipid raft  
328 mediated virus uptake (10), hence we suggest that this putative receptor CD66c being a  
329 component of lipid rafts bears potential to further dissect and solve the enigma of the viral  
330 internalization mechanism. In addition to that, Sialyl-Lewis<sup>X</sup> is reported as the common  
331 receptor determinant of a number of influenza viruses of the terrestrial poultry (30). Therefore  
332 presence of Sialyl-Lewis<sup>X</sup> on the CD66c molecules makes the latter a strong glycoprotein  
333 receptor candidate for the IAV. More importantly, in human lungs there is abundant expression  
334 of CEACAM6 by alveolar and bronchial epithelial cells, where it also demonstrates surfactant  
335 association and secretion into lung-lining fluid (31). These features of CD66c with respect to  
336 human lungs make this molecule vulnerable to respiratory pathogens like IAV. More

337 importantly, like other CEACAMs, which are receptors for respiratory pathogens (bacteria)  
338 including *Haemophilus influenzae* and *Moraxella catarrhalis* (32, 33), CEACAM6 (CD66c)  
339 from above results, serves as a receptor for yet another respiratory pathogen - IAV.

340 It is reported that when pathogens interact with the CEACAM receptors, there is  
341 significant activation of PI3K signaling during internalization of the pathogen (34). In our  
342 previous report, we validated the activation of PI3k/Akt pathways when CEACAM6 (CD66c)  
343 interacts with influenza NA (12), here we demonstrate viral internalization upon NA-CD66c  
344 interaction at the cell surface. Also, this new finding on CD66c provides support to the  
345 viewpoint of a contentious argument made in the past on a role for NA in influenza entry (35,  
346 36).

347 More importantly, viruses frequently exploit chemokine receptors, some CD markers  
348 and other membrane glycoproteins of IgSF as their receptors for entry and also for  
349 manipulating the host defense mechanism (37). For this reason, a majority of these  
350 immunomodulatory studies get direct reference to viral infections or immune evasion, at the  
351 entry stage, which are to a great extent, centric to the interaction of the viral spike glycoproteins  
352 with such cellular receptors and co-receptors. It is important to mention here that, the receptor  
353 CD66c is also a member of IgSF and plays a number of crucial immunomodulatory roles in  
354 human. To cite a few examples, during multiple myeloma CD66c inhibits cytotoxic T cell  
355 activation, in normal neutrophils it is known as an activation marker that stimulates neutrophil  
356 signaling (38, 39). Further, CD66c increases apoptosis in B-cell precursor acute lymphoblastic  
357 leukemia cells (40). Another set of evidence on the expression of CEACAMs in human lung  
358 and their modulated co-expression by type I and type II interferon was reported recently (33,  
359 41). Altogether these studies establish CD66c as an active immunomodulatory molecule  
360 playing a significant role in innate and adaptive immunity in human. Accordingly, for being an  
361 active immunomodulatory molecule and with presence on T cells and Macrophages, we took

362 elements of caution into consideration while designing animal experiments and interpreting  
363 data thereof (**Figure S1**).

364 Therefore we argue that immunomodulatory studies carried out earlier in abeyance of  
365 any glycoprotein receptor for IAV were rather incomplete and CD66c at the helm of  
366 immunomodulation and its interaction with virus during internalization has potential to unfold  
367 the precise mechanism of influenza infection, consequent immune response and cell tropism.  
368 Lack of any identified glycoprotein receptor during IAV attachment and entry, had greatly  
369 limited influenza research discourse in this direction whereas similar questions had been  
370 addressed well with other viruses (42).

371

## 372 **Material and methods**

### 373 **Plasmid constructs, antibodies, virus strains, and mammalian cell lines**

374 pRc/CMV plasmid with full-length untagged CD66c gene was used for expression in  
375 mammalian cell lines. Human CLEC4M/DC-SIGNR/CD299 gene cDNA ORF clone (cat.  
376 HC00654) was purchased from ACROBiosystem Co. LTD. EGFR-GFP plasmid (in EGFP  
377 clontech vector backbone) was gifted from Professor Maddy Parson, King's College London.  
378 Monoclonal anti-CD66c antibody (mAb anti-CD66c) was purchased from Santa Cruz  
379 Biotechnology, Santa Cruz, CA (Catalog # sc-59899) and anti-NA ( $\alpha$ NA) antibody was  
380 purchased from Meridian Life Sciences (Saco, ME). Secondary antibody anti-mouse Alexa  
381 Fluor<sup>®</sup> 594 was used against mAb anti-CD66c and anti-rabbit Alexa Fluor<sup>®</sup> 488 against  $\alpha$ NA.  
382 Anti-CD209/CD299 (DC-SIGN/L-SIGN) was purchased from BioLegend. A/Puerto Rico/8/34  
383 (PR8) influenza virus strain was used for virus infection experiments both in mammalian cell  
384 lines and mice. For detection of viral M1 protein, in-house raised antisera against M1 VLP was  
385 used (43). For detection of NP in flow cytometry and confocal experiments FITC conjugated  
386 anti-NP from abcam<sup>®</sup> was used (Catalog # ab20921). Influenza virus NP protein was detected

387 using rabbit antisera raised against purified and disrupted PR8 virus (44), which was a kind gift  
388 from Dr. Balaji Manicassamy (UIC, Chicago). Virus was used at multiplicity of infection  
389 (m.o.i.) of 1 unless where specified. Cell lines such as, Human lung adenocarcinoma epithelial  
390 (A549) and NIH3T3 mouse embryonic fibroblast, were purchased from ATCC. Lec2CHO cell  
391 line was gifted by Dr. S. Gopalan Sampath Kumar, National Institute of Immunology, New  
392 Delhi. Experiments related to human hepatoma cell line, Huh7.5 and JFH-1 infectious HCV  
393 were conducted in Dr. Waris's lab. For biochemical experiment in BALB/c mice we used  
394 purified recombinant CD66c, expressed in mouse myeloma cell line, purchased from R&D  
395 systems (catalog # 3934-CM, activity checked by the manufacturer).

396

#### 397 **RNA interference and virus infection experiments**

398 Mock-infected and PR8-infected A549 and Huh 7.5 cells were transfected with CD66c siRNA  
399 according to the manufacturer's protocols (Santa Cruz Biotechnology). A concentration of  
400 30nM of siRNA was used. The Huh 7.5 cells treated with Si-RNA were cultured into 6 well  
401 plates for 48 h then either left uninfected or infected with 0.5 MOI of HCV in the incomplete  
402 Dulbecco's Modified Eagle's Medium (DMEM) medium for 5 hours, then replaced with  
403 complete DMEM medium, followed by incubation for 48 hours in the 5% CO<sub>2</sub> incubator at  
404 37°C. Similarly, A549 cells were infected with PR8 virus but with different MOI (1-5), MOI 1  
405 for virus infection level detection and MOI 5 for the virus binding experiments (also specified  
406 in legends to figures).

407

#### 408 **Antibody mediated receptor blockade experiments and influenza infection to the cells**

409 Cells (A549 and NIH3T3) were plated at a density of 10<sup>6</sup>/well in a 6-well culture plate. The cell  
410 monolayers were washed with PBS three times and incubated either with anti-CD66c mAb or  
411 with IgG1 isotype antibody, in 200µL of PBS with 3% fetal calf serum (FCS) for 40 minutes at  
412 20°C. Unbound antibody was removed by washing cells with PBS following which cell



413 monolayer was incubated with PR8 virus in OPTI-MEM (3% FCS) for 1 h at 37°C under 5%  
414 CO<sub>2</sub>. The medium was replaced with DMEM (10% FCS) and cells were incubated at 37°C  
415 under 5% CO<sub>2</sub>. Cells were harvested for time points of 8 h.p.i or 24 h.p.i. The extent of viral  
416 infection in cells was determined by probing viral proteins (M1 and NP) through flow  
417 cytometry and western blot analysis.

418

#### 419 **Immunofluorescence microscopy**

420 Intracellular and extracellular immuno-staining of cells were performed during this study. For  
421 intracellular staining, cell monolayer, that was fixed by overlaying 4% paraformaldehyde, was  
422 permeabilised by treating with PBS containing 0.5% Triton X-100 for 10 minutes at 37°C.  
423 Following this, the cell monolayer was conditioned and blocked with Phosphate-buffered saline  
424 (PBS) containing 0.5% Triton X-100 and 0.5% [wt/vol] Bovine serum albumin (BSA) for 1 h.  
425 Permeabilised cells were incubated with FITC-conjugated primary antibody against viral NP at  
426 a dilution of 1:200 in antibody solution (PBS containing 0.5% Triton X-100, 0.1% [wt/vol]  
427 sodium azide and 0.5% [wt/vol] BSA) for 30 min. This was followed by washing cells with  
428 PBS containing 0.5% Triton X-100 to remove excess antibodies and mounting cells on slides  
429 for observation under confocal microscope (A1R; Nikon, Tokyo, Japan). For extracellular  
430 staining was two-step process, wherein cells fixed in 4% paraformaldehyde were incubated  
431 with primary antibody (anti-CD66c or anti-NA) followed by respective fluorescent secondary  
432 antibodies, bypassing the cell permeabilisation step. Primary antibody was used at a dilution of  
433 1:100 and secondary antibodies were used at a dilution ratio of 1:1000 in antibody solution.

434

#### 435 **Flow cytometric analysis**

436 For intracellular Influenza NP staining, viral infected cells were washed with PBS and  
437 centrifuged to remove debris. Single cell suspension thus formed was fixed with 4%  
438 paraformaldehyde (PFA) in PBS. Fixed cells were then washed twice with PBS containing 3%

439 FCS and resuspended in a permeabilisation buffer (Cytotfix/Cytoperm kit; BD) for 10 minutes.  
440 The permeabilised cells were incubated for 45 minutes with Fluorescein isothiocyanate (FITC)  
441 conjugated NP antibody (primary) in PBS (with 3% FCS). The stained cells were washed with  
442 buffer (3% FCS in PBS) to remove unbound antibody and taken for cytometric readings. For  
443 extracellular staining of CD66c or the viral NA attached to cells during virus binding  
444 experiments, we performed standard extracellular staining protocol bypassing the cell  
445 permeabilisation step. Cells with or without virus on their surface were fixed with 4% PFA in  
446 PBS, followed by washing with PBS. Fixed cells or cell-virus complex were then incubated  
447 with anti-CD66c primary monoclonal antibody or anti-NA primary antibody in 50  $\mu$ L of PBS  
448 with 3% FCS for 40 minutes at 4°C (antibodies to solution ratio was 1:200). After washing  
449 unbound antibodies cells were incubated with secondary antibody against these primary  
450 antibodies (anti-CD66c, anti-NA) in 50 $\mu$ L of PBS with 3% FCS for 40 minutes at 4°C. Ratio of  
451 secondary antibodies to solution was 1:1000 (v/v). After washing unbound secondary  
452 antibodies to cells in PBS with 3% FCS, stained cells were taken for cytometric analysis.  
453 Fluorescence intensity was measured by flow cytometry (FACS Calibur; BD) and data was  
454 analysed using FlowJo (Tree star, USA).

455

#### 456 **Semi quantitative and real-time pcr**

457 Total RNA from cells was extracted using RNeasy Mini Kit (Qiagen) and treated with DNase I  
458 (Invitrogen). 2 $\mu$ g of RNA was reverse-transcribed using M-MLV Reverse Transcriptase  
459 (ThermoFisher, Catalog # 28025013) in a volume of 20  $\mu$ L. The synthesized cDNA was  
460 diluted 1:5 in water. 2.0  $\mu$ L of cDNA was then used in a SYBR<sup>®</sup> Green PCR Master Mix  
461 (Applied Biosystems) based real-time PCR reactions in a volume of 20  $\mu$ L. StepOne<sup>™</sup> PCR  
462 machine was used to acquire real-time PCR readouts.

463

464 Primer sequence: Following primer sequences were used for the semi quantitative and Real-  
465 time pcr reactions.

466

|                 | Primer Sequence         |
|-----------------|-------------------------|
| NP forward      | CTGATGGAGAACGCCAGAAT    |
| NP reverse      | TTCGTCAAAAGCAGAGAGCA    |
| M1 forward      | CGAGATCGCACAGAGACTTG    |
| M1 reverse      | TTC CCA TTA AGGGCATTTTG |
| ARPP P0 forward | GCACTGGAAGTCCAACACTTC   |
| ARPP P0 reverse | TGAGGTCCTCCTTGGTGAACAC  |

467

#### 468 **Incubation of virus with recombinant protein, intranasal challenge of mice and lung**

#### 469 **histology**

470 1 µg of recombinant CD66c protein was incubated with 50 µL of PR8 virus in PBS, with a titer  
471 of  $1.48 \times 10^9$  pfu/mL, for 30 minutes so that protein binds with virus. Six-week-old female  
472 BALB/c mice were first anaesthetized with isoflurane, and were inoculated with 50 µL of virus  
473 (incubated with recombinant CD66c), in PBS intranasally. Mock mice group were inoculated  
474 with 50 µL of virus pre-incubated with BSA as a protein control. Also a group of mice was  
475 inoculated with untreated PR8 virus (virus without any protein incubation). Survival and the  
476 body weight of the mice were monitored regularly for 10 days post infection. Mice were then  
477 euthanized and lungs were taken out for study. Lung tissues were preserved in formalin  
478 embedded in paraffin and were cut in uniform 4-µm sections. Tissue sections were stained with  
479 hematoxylin and eosin stain and examined for histopathological changes under the microscope  
480 at 20X magnification.

481

482 **References**

483

- 484 1. Varki, A. 2007 Glycan-based interactions involving vertebrate sialic-acid-recognizing  
485 proteins. *Nature* **446 (7139)**: 1023-9.
- 486 2. Varki, A. 1993 Biological roles of oligosaccharides: all of the theories are correct.  
487 *Glycobiology* **3(2)**: 97-130.
- 488 3. Schauer, R. 2009 Sialic acids as regulators of molecular and cellular interactions. *Curr*  
489 *Opin Struct Biol* **19(5)**: 507-14.
- 490 4. Matrosovich, M., Herrler, G., and Klenk, H. D. Sialic Acid Receptors of Viruses. 2015  
491 *Top Curr Chem* **367**:1-28.
- 492 5. Mercer, J., Schelhaas, M., and Helenius, A. 2010 Virus entry by endocytosis. *Annual*  
493 *review of biochemistry* **79**: 803-833.
- 494 6. Gottschalk, A. in *The Viruses: Biochemical Biological and Biophysical Properties*, eds.  
495 Burnet, F. M. & Stanley, W. M. (Academic, New York), 1959 Vol. **3**: pp. 51–61.
- 496 7. Londrigan, S. L., Turville, S. G., Tate, M. D., Deng, Y. M., Brooks, A. G., and Reading,  
497 P. C. 2011 N-linked glycosylation facilitates sialic acid-independent attachment and  
498 entry of influenza A viruses into cells expressing DC-SIGN or L-SIGN. *Journal of*  
499 *Virology* **85**: 2990-3000.
- 500 8. de Vries, E., de Vries, R. P., Wienholts, M. J., Floris, C. E., Jacobs, M. S., van den  
501 Heuvel, A., Rottier, P. J., and de Haan, C. A.E. 2012 Influenza A virus entry into cells  
502 lacking sialylated N-glycans. *Proceedings of the National Academy of Sciences of the*  
503 *United States of America* **109**: 7457–7462.
- 504 9. Chu, V. C., and Whittaker, G. R. 2004 Influenza virus entry and infection require host  
505 cell N-linked glycoprotein. *Proceedings of the National Academy of Sciences of the*  
506 *United States of America*. **101**:18153–18158.

- 507 10. Eierhoff, T., Hrincius, E. R., Rescher, U., Ludwig, S., and Ehrhardt, C. 2010 The  
508 epidermal growth factor receptor (EGFR) promotes uptake of influenza A viruses (IAV)  
509 into host cells. *PLoS pathogens* **6**: e1001099.
- 510 11. Lozach, P. Y., Burleigh, L., Staropoli, I., and Amara, A. 2007 The C type lectins DC-  
511 SIGN and L-SIGN: receptors for viral glycoproteins. *Methods Mol Biol* **379**: 51-68.
- 512 12. Gaur, P., Ranjan, P., Sharma, S., Patel, J. R., Bowzard, J. B., Rahman, S. K., Kumari, R.,  
513 Gangappa, S., Katz, J. M., Cox, N. J., Lal, R. B., Sambhara, S., and Lal, S. K. 2012  
514 Influenza A virus neuraminidase protein enhances cell survival through interaction with  
515 carcinoembryonic antigen-related cell adhesion molecule 6 (CEACAM6) protein. *J Biol*  
516 *Chem* **287**: 15109-15117.
- 517 13. Barton, E. S., Forrest, J. C., Connolly, J. L., Chappell, J. D., Liu, Y., Schnell, F. J.,  
518 Nusrat, A., Parkos, C. A., and Dermody, T. S. 2001 Junction adhesion molecule is a  
519 receptor for reovirus. *Cell* **104**: 441-451.
- 520 14. Staunton, D. E., Merluzzi, V. J., Rothlein, R., Barton, R., Marlin, S. D., and Springer, T.  
521 A. 1989 A cell adhesion molecule, ICAM-1, is the major surface receptor for  
522 rhinoviruses. *Cell* **56**: 849-853.
- 523 15. Dermody, T. S., Kirchner, E., Guglielmi, K. M., and Stehle, T. 2009 Immunoglobulin  
524 superfamily virus receptors and the evolution of adaptive immunity. *PLoS pathogens* **5**:  
525 e1000481.
- 526 16. Coyne, C. B., Bergelson, and J. M. 2006 Virus-induced Abl and Fyn kinase signals  
527 permit coxsackievirus entry through epithelial tight junctions. *Cell* **124**: 119-131.
- 528 17. Maddon, P. J., Dalgleish, A. G., McDougal, J. S., Clapham, P. R., Weiss, R. A., and  
529 Axel, R. 1986 The T4 gene encodes the AIDS virus receptor and is expressed in the  
530 immune system and the brain. *Cell* **47**: 333-348.

- 531 18. Evans, M. J., von Hahn, T., Tscherne, D. M., Syder, A. J., Panis, M., Wolk, B.,  
532 Hatziioannou, T., McKeating, J. A., Bieniasz, P. D., and Rice, C. M. 2007 Claudin-1 is  
533 a hepatitis C virus co-receptor required for a late step in entry. *Nature* **446**: 801-805.
- 534 19. Mendelsohn, C. L., Wimmer, E., and Racaniello, V. R. 1989 Cellular receptor for  
535 poliovirus: molecular cloning, nucleotide sequence, and expression of a new member of  
536 the immunoglobulin superfamily. *Cell* **56**: 855-865.
- 537 20. Geraghty, R. J., Kruppenacher, C., Cohen, G. H., Eisenberg, R. J., and Spear, P. G.  
538 1998 Entry of alphaherpesviruses mediated by poliovirus receptor-related protein 1 and  
539 poliovirus receptor. *Science* **280**: 1618-1620.
- 540 21. de Vries, E., Tscherne, D. M., Wienholts, M. J., Cobos-Jiménez, V., Scholte, F., García-  
541 Sastre, A., Rottier, P. J. and de Haan, C., A. 2011 Dissection of the influenza A virus  
542 endocytic routes reveals macropinocytosis as an alternative entry pathway. *PLoS*  
543 *Pathog* **7(3)**: e1001329.
- 544 22. Sieczkarski, S. B., and Whittaker, G. R. 2002 Influenza virus can enter and infect cells  
545 in the absence of clathrin-mediated endocytosis. *J Virol* **76(20)**: 10455-64.
- 546 23. Lakadamyali M, Rust MJ, and Zhuang X. 2004 Endocytosis of influenza viruses.  
547 *Microbes Infect* **6(10)**: 929-36.
- 548 24. Lakadamyali, M, Rust, M. J., Babcock, H. P. and Zhuang, X. 2003 Visualizing infection  
549 of individual influenza viruses *Proceedings of the National Academy of Sciences of the*  
550 *United States of America* **100(16)**: 9280-5.
- 551 25. Rust, M. J., Lakadamyali, M., Zhang, F., and Zhuang, X. 2004 Assembly of endocytic  
552 machinery around individual influenza viruses during viral entry. *Nat Struct Mol Biol*  
553 **11(6)**: 567-73.
- 554 26. Matlin, K. S., Reggio, H., Helenius, A., and Simons, K. 1981 Infectious entry pathway  
555 of influenza virus in a canine kidney cell line. *J Cell Biol* **91(3 Pt 1)**: 601-13.

- 556 27. Sieczkarski, S. B., and Whittaker, G. R. 2003 Differential requirements of Rab5 and  
557 Rab7 for endocytosis of influenza and other enveloped viruses. *Traffic* **4(5)**: 333-43.
- 558 28. Khor, R., McElroy, L. J., and Whittaker, G. R. 2003 The ubiquitin-vacuolar protein  
559 sorting system is selectively required during entry of influenza virus into host cells.  
560 *Traffic* **4(12)**: 857-68.
- 561 29. Mothes W., Sherer, N. M., Jin, J., and Zhong, P. 2010 Virus cell-to-cell transmission. *J*  
562 *Virol* **84(17)**: 8360-8.
- 563 30. Gambaryan, A. S., Tuzikov, A. B., Pazynina, G. V., Desheva, J. A., Bovin, N. V.,  
564 Matrosovich, M. N., and Klimov, A. I. 2008 6-sulfo sialyl Lewis X is the common  
565 receptor determinant recognized by H5, H6, H7 and H9 influenza viruses of terrestrial  
566 poultry. *Virology* **5**: 85.
- 567 31. Kolla, V., Gonzales, L. W., Bailey, N. A., Wang, P., Angampalli, S., Godinez, M. H.,  
568 Madesh, M., Ballard, P. L. 2009 Carcinoembryonic cell adhesion molecule 6 in human  
569 lung: regulated expression of a multifunctional type II cell protein. *Am J Physiol Lung*  
570 *Cell Mol Physiol* **296**: L1019-1030.
- 571 32. Hill, D. J., and Virji, M. 2003 A novel cell-binding mechanism of *Moraxella catarrhalis*  
572 ubiquitous surface protein UspA: specific targeting of the N-domain of  
573 carcinoembryonic antigen-related cell adhesion molecules by UspA1. *Mol Microbiol*  
574 **48**: 117-129.
- 575 33. Klaile, E., Klassert, T. E., Scheffrahn, I., Muller, M. M., Heinrich, A., Heyl, K. A.,  
576 Dienemann, H., Grunewald, C., Bals, R., Singer, B. B. 2013 Carcinoembryonic antigen  
577 (CEA)-related cell adhesion molecules are co-expressed in the human lung and their  
578 expression can be modulated in bronchial epithelial cells by non-typable *Haemophilus*  
579 *influenzae*, *Moraxella catarrhalis*, TLR3, and type I and II interferons. *Respir Res* **14**:  
580 85.

- 581 34. Voges, M., Bachmann, V., Naujoks, J., Kopp, K., and Hauck, C. R. 2012 Extracellular  
582 IgC2 constant domains of CEACAMs mediate PI3K sensitivity during uptake of  
583 pathogens. *PLoS One* **7**: e39908.
- 584 35. Matrosovich, M. N., Matrosovich, T. Y., Gray, T., Roberts, N. A., and Klenk, H. D.  
585 2004 Neuraminidase is important for the initiation of influenza virus infection in human  
586 airway epithelium. *Journal of Virology* **78**:12665-12667.
- 587 36. Ohuchi, M., Asaoka, N., Sakai, T., and Ohuchi, R. 2006 Roles of neuraminidase in the  
588 initial stage of influenza virus infection. *Microbes and infection / Institut Pasteur* **8**:  
589 1287-1293.
- 590 37. Alami, A. 2003 Viral mimicry of cytokines, chemokines and their receptors. *Nat Rev*  
591 *Immunol* **3**: 36-50.
- 592 38. Skubitz, K. M., Campbell, K. D., and A. P. Skubitz. 1996 CD66a, CD66b, CD66c, and  
593 CD66d each independently stimulate neutrophils. *J Leukoc Biol* **60**: 106-117.
- 594 39. Witzens-Harig, M., Hose, D., Junger, S., Pfirschke, C., Khandelwal, N., Umansky, L.,  
595 Seckinger, A., Conrad, H., Brackertz, B., Reme, T. Gueckel, B., Meißner, T., Hundemer,  
596 M., Ho, A. D., Rossi, J. F., Neben, K., Bernhard, H., Goldschmidt, H., Klein, B.,  
597 Beckhove, P. 2013 Tumor cells in multiple myeloma patients inhibit myeloma-reactive  
598 T cells through carcinoembryonic antigen-related cell adhesion molecule-6. *Blood* **121**:  
599 4493-4503.
- 600 40. Kanderova, V., Hrusak, O., and Kalina, T. 2010 Aberrantly expressed CEACAM6 is  
601 involved in the signaling leading to apoptosis of acute lymphoblastic leukemia cells.  
602 *Exp Hematol* **38**: 653-660.
- 603 41. Fahlgren, A., Baranov, V., Frangsmyr, L., Zoubir, F., Hammarstrom, M. L., and  
604 Hammarstrom, S. 2003 Interferon-gamma tempers the expression of carcinoembryonic  
605 antigen family molecules in human colon cells: a possible role in innate mucosal  
606 defense. *Scand J Immunol* **58**: 628.



- 607 42. Berger, E. A., Murphy, P. M., and Farber, J. M. 1999 Chemokine receptors as HIV-1  
608 coreceptors: roles in viral entry, tropism, and disease. *Annu Rev Immunol* **17**, 657-700.
- 609 43. Baniyadi, V., and Lal, S. K. 2014 A novel method to produce Influenza A virus matrix  
610 protein M1 Capsid Like Particles (CLPs). *J Virol Methods* **205C**: 1-2.
- 611 44. Medina, R.A., Stertz, S., Manicassamy, B., Zimmermann, P., Sun, X., Albrecht, R. A.,  
612 Uusi-Kerttula, H., Zagordi, O., Belshe, R. B., Frey, S. E., Tumpey, T.M., and García-  
613 Sastre, A. 2013 Glycosylations in the globular head of the hemagglutinin protein  
614 modulate the virulence and antigenic properties of the H1N1 influenza viruses. *Sci*  
615 *Transl Med* **5(187)**: 187-70.

616

617 **The abbreviations used are:**

618 SIA, sialic acid; IAV, influenza A virus; EGFR, epidermal growth factor receptor; L-SIGN,  
619 Liver/lymph node-specific intercellular adhesion molecule-3-grabbing integrin; DC-SIGN,  
620 Dendritic cell-specific intercellular adhesion molecule-3-grabbing nonintegrin; GPI-anchored,  
621 Glycosylphosphatidylinositol-anchored; HA, Hemagglutinin; NA, neuraminidase; PI3K,  
622 phosphatidylinositide 3-kinases; NA-CD66c, interaction between Neuraminidase and CD66c;  
623 NP, nucleoprotein of IAV, M1, a matrix of IAV; CAMs, cell adhesion molecules; IgSF,  
624 immunoglobulin superfamily; mAb, monoclonal antibody; CEACAM6, carcinoembryonic  
625 antigen-related cell adhesion molecule 6; CD66c, cluster of differentiation 66c; m.o.i.,  
626 multiplicity of infection; h.p.i, hours post infection; DAPI, 4',6-diamidino-2-phenylindole;  
627 HCV, Hepatitis C virus.

628

629 **Keywords**

630 Virus, Lipid raft, Flu, Influenza A Virus, Receptor, Neuraminidase, Hemagglutinin, CEA,  
631 CEACAM, CEACAM6, CD66c, IgG super family, Sialic acid.

632

633 **COMPETING FINANCIAL INTERESTS**

634 The authors declare no competing interests.

635

636 **Authors' contribution**

637 S.K.R. and S.K.L. conceived, planned and orchestrated the project. S.K.R. planned and  
638 optimized antibody mediated cell blockade experiments in human lung A549 cells. S.K.R.  
639 performed other experiments carried out in A549 and lec2CHO cell lines. P.G. performed  
640 experiments in NIH3T3 cell lines. M.A.A. performed comparative binding, entry of IAV with  
641 reference to CD66c, EGFR, DC-SIGN and siRNA (against CD66c expression) experiments to  
642 compare entry of IAV and HCV. I.A., C.C., S.S., and S.C performed virus experiments in mice.  
643 D.K.V. performed virus entry experiment in HEK cells. S.K.R. prepared first draft of the  
644 manuscript. S.K.R., N.N and S.K.L further improved the manuscript from inputs of other  
645 authors. S.K.R., D.W., G.W., and S.K.L critically analyzed the datasets.

646

647 **ACKNOWLEDGEMENT**

648 S.K.R was awarded CSIR JRF funding. The plasmid pRc/CMV with untagged CD66c was a  
649 generous gift from Wolfgang Zimmermann (Tumor Immunology Laboratory Life Center,  
650 University Clinic-Grosshadern Muenchen, Germany). The authors thank Professor Maddy  
651 Parsons, King's College London for EGFR-GFP Plasmid. We thank Dr. Aftab Ahmad,  
652 University of Alabama at Birmingham for A549 cells, Dr. Joseph Reynolds for PR8 whole  
653 virus and Balaji Manicassamy (UIC, Chicago) for antisera raised against purified and disrupted  
654 PR8 virus. The authors thank Purnima Kumar (ICGEB), Ravinder Kumar (ICGEB) and Jyoti  
655 Batra (ICGEB) for their help with the reagents and media preparation. Initial support from  
656 Sultan Tousif (ICGEB) during flow cytometry measurements is duly acknowledged.

657

658 **Figure Legends**

659

660 **Figure 1 (a): Flow cytometry analysis of surface expression of CD66c in A549 cells.** Cell  
661 surface expression of untagged CD66c was determined using flow cytometer, where cells were  
662 stained for CD66c (Alexa-594). Cell population transiently overexpressing CD66c shows  
663 signal for higher expression of CD66c on the cell surface (black) as compared to A549 cells  
664 (grey). The unstained control cells are shown in white.

665

666 **Figure 1 (b): Flow cytometry analysis of virus binding on A549 cells and CD66c**  
667 **overexpressing A549 cells.** 5 multiplicity of infection (m.o.i.) of PR8 virus binding to a  
668 monolayer of A549 cells was measured by determining signals corresponding to stained NA  
669 protein (Alexa-488) of the virus on host cell surface. In figure, black curve denotes signal of  
670 unstained cells while grey curve depicts the signal for viral NA corresponding to the virus  
671 binding on the cell surface. The left panel shows that virus is binding to ~ 18% of A549 cell  
672 population. However, the right panel shows that PR8 virus binding is increased to more than  
673 80% of CD66c overexpressing A549 cell population.

674

675 **Figure 1 (c): Demonstration of virus binding to A549 cell surface, through**  
676 **immunofluorescence assay and confocal microscope.** To a monolayer of A549 cells, binding  
677 of 5 multiplicity of infection (moi) of PR8 virus was observed under confocal microscope  
678 (A1R; Nikon, Tokyo, Japan) at 60X magnification, after extracellular immune-fluorescence-  
679 assay (IFA) staining of viral NA and host CD66c protein. Panels can be numbered 1 to 4 from  
680 left to right. Panel 1 shows cell nuclei stained with DAPI in cells of the selected microscopic  
681 field. Panel 2 shows that, CD66c (red) being a membrane protein is mainly at the periphery of  
682 cells. Panel 3 shows that virus is present at the surface of A549 cells (green), as cells were fixed  
683 just after their brief binding on cell. In Panel 4 we see the colocalisation (yellow) of NA protein  
684 of PR8 virus (green) with host membrane protein CD66c (red) at the periphery of cells.

685

686 **Figure 2 (a): Real time quantification of NP and M1 mRNA in viral infected A549 cells.**

687 The untagged CD66c expressing plasmids were transfected into A549 lung cell lines. 48 hour  
688 post transfection, cells were infected with 1.0 multiplicity of infection (m.o.i.) A/PR8/34  
689 influenza virus. 8 hours post infection (8 h.p.i) infected cells were harvested for mRNA  
690 isolation and subsequent quantification. Levels of two viral mRNA NP and M1 were quantified  
691 to compare the viral load in infected lung cells. Figure shows higher mRNA levels of NP (left  
692 two bars) and M1 (right two bars) in cells overexpressing CD66c. Each bar represents mean of  
693 five independent experimental readings. **(b): Semi quantification of viral M1 by RT-PCR.**

694 For the above mentioned reaction condition (8 h.p.i, and 1 m.o.i.) viral M1 mRNA was also  
695 measured semi-quantitatively. A549 cells are denoted with 'C' before respective lanes and  
696 likewise A549 cells having overexpressed CD66c with 'T'. Cycles are the number of PCR  
697 cycles. **(c): Flow cytometric analysis for virus load in A549 infected cell:** Following similar  
698 gene expression and viral infection conditions (8 h.p.i.), in another set of experiment, A549  
699 cells were harvested to quantify protein level of viral NP through flow cytometry, in cells  
700 infected with 0.5 m.o.i. of A/PR8/34 influenza virus. NP expression levels in cells were  
701 measured through intracellular staining by NP-FITC conjugated antibody. The bar diagram  
702 shows rise in viral NP in CD66c overexpressing A549 cells (right) than that in A549 cells (left).  
703 Each bar represents mean of three independent experimental readings. Data represent mean  
704 values of at least three independent experiments  $\pm$  SD. Statistical significance was assessed by  
705 student's t-test, (\*) for  $p \leq 0.05$ , (\*\*) for  $p \leq 0.01$  and (\*\*\*) for  $P \leq 0.001$ .

706 **(d):** Representative FACS snapshot of unstained A549 cells showing no signal corresponding  
707 to NP-FITC in lower-right quadrant.

708 **(e):** A549 cells show some signal corresponding to NP-FITC in lower-right quadrant.

709 **(f):** A549 cells overexpressing CD66c is shown to have increased NP-FITC signal in lower-  
710 right quadrant.

711  
712 **Figure 3: Demonstration of rise in viral uptake in CD66c overexpressing NIH 3T3 and**  
713 **Lec2-CHO cell lines. (a):** The level of infection as probed by the NP mRNA fold-change is  
714 shown as bars. The bar in the right end shows increased influenza infection in CD66c  
715 transfected NIH3T3 cell lines. **(b):** Lec2 CHO-CD66c is CD66c overexpressing Lec2 CHO cell  
716 lines. The right bar shows greater virus binding on the surface of cells overexpressing CD66c.  
717 **(c):** The right bar in the figure shows increased level of viral NP mRNA Lec2 CHO-CD66c  
718 cells (right bar) as compared to Lec2 CHO cells (left bar) suggesting increased virus entry.  
719 **(d):** The left bar shows levels of mRNA corresponding to lower infection level in HEK cells  
720 and the right bar shows an increase in infection in CD66c overexpressing HEK cells.

721  
722 **Figure 4 (a): Knockdown of CD66c shows inhibition of virus binding on cell surface**  
723 **under fluorescent microscope.** Here, UI denotes uninfected cells; 5', Cells after 5 minutes of  
724 virus binding to them. Figure shows that A549 cells treated with siRNA control (negative) do  
725 not inhibit expression level of CD66c (green) and therefore binding of 5 MOI of PR8 viruses  
726 on cell surface can be seen. Figure shows colocalisation between NA (red) and CD66c (green)  
727 in merged view (yellow) (second panel from top, pointed with white arrow). Amount of co-  
728 localization between NA and CD66c and absence of NA (red color) in control siRNA treated  
729 cells signifies possible colocalisation between CD66c and NA at the host cell surface. The  
730 lowest two panels show diminished green signals in cells treated with CD66c siRNA  
731 suggesting a poor expression of CD66c protein (green). Consequently, virus binding on siRNA-  
732 CD66c treated cells is not seen, as evident by the absence of any green (CD66c) or red (NA)  
733 signal (bottom panel).

734  
735 **Figure 4 (b): siRNA-mediated knockdown of CD66c shows inhibition of virus entry into**  
736 **lung-cells infected with 1 m.o.i. of PR8 virus, through western blot analysis.** Here, Si-CT

737 denotes control siRNA treated cells; Si-CD66c is cells treated with CD66c siRNA. 8h is cells  
738 harvested after 8 hours of infection (one life cycle of IAV), UI, is uninfected cells. A549 cells  
739 treated with siRNA shows complete knock down of the receptor molecule CD66c (third panel  
740 from top) while control siRNA treated cells do not show any reduction in expression of CD66c  
741 (left two wells of third panel). The fourth panel from top shows level of A/PR8/34 influenza  
742 virus entry in cells determined by expression levels of viral NP protein. The second well from  
743 left shows significant expression level of viral NP protein in cells treated with control siRNA,  
744 eight hours after infection. In contrast, the right most well shows a marked reduction of IAV  
745 entry in cells treated with CD66c siRNA, as determined by low expression level of viral protein  
746 NP eight hours after infection. Conclusively, virus entry was inhibited in absence of CD66c  
747 (CD66c siRNA treated cells). CD66c siRNA treated cells do not show any noticeable change  
748 in expression levels of EGFR (top most panel) and DC-SIGN (second panel from top). For  
749 loading control  $\beta$ -Actin was probed (the bottom panel).

750

751 **Figure 5: Antibody mediated receptor blockade experiments in CD66c overexpressing**  
752 **cells. (a):** The figure shows level of A/PR8/34 influenza virus entry in a monolayer of NIH3T3-  
753 CD66c cells when treated with mAb anti-CD66c prior to infection. From left to right, the first  
754 bar in the figure represents levels of viral NP mRNA (a measure of virus entry) in untreated  
755 NIH3T3-CD66c. Bars second to fifth from left show levels of viral NP mRNA in virus-infected  
756 cells treated with mAb anti-CD66c at the concentration of 1.0  $\mu\text{g/mL}$ , 1.5  $\mu\text{g/mL}$ , 2.0  $\mu\text{g/mL}$   
757 and 8.0  $\mu\text{g/mL}$  respectively. Conclusively, the data show decrease in virus entry in cells treated  
758 with anti-CD66c in a dose dependent manner. Data represent mean values of at least three  
759 independent experiments  $\pm$  SD. Statistical significance was assessed by student's t-test  
760 (GraphPad), (\*) for  $p \leq 0.05$ , (\*\*) for  $p \leq 0.01$  and (\*\*\*) for  $P \leq 0.001$ . **(b):** A western blot  
761 showing expression levels of viral NP protein in virus-infected NIH3T3-CD66c when treated

762 with corresponding concentrations of mAb anti-CD66c 1.0  $\mu\text{g}/\text{mL}$ , 1.5  $\mu\text{g}/\text{mL}$ , 2.0  $\mu\text{g}/\text{mL}$ , 4.0  
763  $\mu\text{g}/\text{mL}$  and 8.0  $\mu\text{g}/\text{mL}$ , prior to viral infection. The inhibition of virus entry in anti-CD66c mAb  
764 treated cells was significant at a concentration of 8.0  $\mu\text{g}/\text{mL}$  of CD66c.

765

766 **Figure 6: Antibody mediated receptor blockade experiments in A549 cells expressing**  
767 **endogenous levels of CD66c.**

768 Figure shows A/PR8/34 influenza virus infection levels in lung A549 cells (24 h.p.i.), when  
769 incubated with increasing concentrations of anti-CD66c mAb prior to infection. **(a):** Semi  
770 quantification of viral M1 mRNA shows significant difference in virus entry. Left well shows  
771 M1 mRNA level in A549 cells, the middle well shows that in cells incubated with mAb anti-  
772 CD66c. And the right well shows M1 mRNA level in cells incubated with mock antibody (IgG  
773 isotype antibody) prior to viral infection. **(b):** Densitometry analysis of image (a). The cells  
774 treated with anti-CD66c showed reduced virus entry as against the untreated and IgG isotype  
775 antibody treated cells. The expression level of housekeeping gene acidic ribosomal  
776 phosphoprotein (ARPP) is not affected in any of these cells. **(c):** The black bar represents A549  
777 cell populations expressing viral NP protein (a measure of virus entry) after infection without  
778 any anti-CD66c treatment. Whereas grey bars (from left to right) represent the same in A549  
779 cells treated with anti-CD66c mAb, prior to infection, at the concentrations of 1.0  $\mu\text{g}/\text{mL}$ , 1.5  
780  $\mu\text{g}/\text{mL}$ , 2  $\mu\text{g}/\text{mL}$ , 4  $\mu\text{g}/\text{mL}$  and 8  $\mu\text{g}/\text{mL}$  respectively. Here, the population of virus-infected  
781 cells expressing viral NP protein determines extent of virus entry. Conclusively, the bar  
782 diagram shows that cells treated with anti-CD66c mAb showed inhibited virus entry. The  
783 inhibition of the virus entry varied in a dose (of anti-CD66c) dependent manner. Each bar  
784 represents mean of three independent experimental readings. Data show the mean percent  
785 infection ( $\pm$  SD) from 4 independent experiments. (\*,  $P < 0.05$ ; \*\*,  $P < 0.01$ ) Figures **(d-g)** are  
786 representative snapshots of NP stained cells from flow cytometry.

787 **(d):** Unstained A549 cells showing baseline signal in lower-right quadrant, in 0.0152 % cell  
788 population.

789 **(e):** A549 cells showing good signal corresponding to NP-FITC in lower-right quadrant, in  
790 10.9 % cell population.

791 **(f):** shows A549 cells incubated with 4.0  $\mu\text{g}/\text{mL}$  of mAb anti-CD66c with relatively reduced  
792 NP-FITC signal in the lower-right quadrant, in 3.46 % cell population.

793 **(g):** A549 cells incubated with 8.0  $\mu\text{g}/\text{mL}$  of mAb anti-CD66c is showing reduced NP-FITC  
794 signal in lower-right quadrant, in 1.75 % cell population. **(h): Western blot analysis of**  
795 **infection in A549 cells incubated with anti-CD66c mAb.** The figure shows levels of viral M1  
796 protein expression in virus-infected cells treated with anti-CD66c mAb at a concentration of 1.0  
797  $\mu\text{g}/\text{mL}$ , 1.5  $\mu\text{g}/\text{mL}$  and 2.0  $\mu\text{g}/\text{mL}$ , prior to infection by the virus. It shows a corresponding  
798 decrease in the level of viral M1 protein expression 24 h.p.i in a dose (of anti-CD66c)  
799 dependent manner, suggesting inhibition of virus entry in anti-CD66c treated cells. **(i):**  
800 Densitometry analysis of the western blot shown in (h). From left to right are the bars  
801 representing the level of M1 expression in untreated cells and in those treated with mAb anti-  
802 CD66c at a concentrations of 1.0  $\mu\text{g}/\text{mL}$ , 1.5  $\mu\text{g}/\text{mL}$  and 2.0  $\mu\text{g}/\text{mL}$  respectively. **(j): Immuno-**  
803 **fluorescent assay (IFA) and confocal microscopic analysis of virus entry in A549.** The  
804 figure has three panels from top to bottom each with three images. From left to right in each  
805 panel, we have A549 A/PR8/34 virus-infected cells showing nuclei stained with DAPI (*blue*),  
806 viral NP stained with FITC conjugated primary antibody (*green*) and a superimposed image of  
807 the first two figures showing both channels (blue and green). Here, levels of NP in A549 cells  
808 24 h.p.i are a measure of virus entry in cells. Uppermost panel shows infection level in A549  
809 cells. The middle panel shows infection level in cells that are incubated with mock antibody  
810 (IgG Isotype control) prior to virus infection on the monolayer. The bottom panel shows



811 reduced infection in cells that were incubated with 4  $\mu$ g/mL anti-CD66c mAb before viral  
812 infection.

813

814 **Figure 7: Comparing ability of host membrane proteins CD66c, EGFR and DC-SIGN**  
815 **respectively in IAV binding on A549 cells through fluorescent microscopy.**

816 (a) Here, UI denotes uninfected cells; 5', Cells after 5 minutes of virus binding to them. A549  
817 cells were cultured either with endogenous level of EGFR or with overexpression of EGFR  
818 (through transfection of EGFR plasmids). Cells were then either left uninfected or infected with  
819 5 MOI of A/PR8/34 influenza virus for 5 minutes. Cells were fixed with 4% formaldehyde for  
820 20 minutes and stained extracellularly (without permeabilization) with anti-EGFR and anti  
821 influenza NA antibodies. The secondary antibody Alexa 488 (green) probed host EGFR and  
822 Alexa 594 (red) probed influenza NA, cell nuclei is stained with DAPI (blue). The figure shows  
823 there is no trace of virus binding in uninfected cells (top panel). However, modest virus binding  
824 on cell surface is observed after 5 minutes of incubation as determined by staining influenza  
825 neuraminidase NA (red). Interestingly, figure shows that only few virus particles are  
826 colocalizing with EGFR (middle panel, yellow spots pointed with white arrow). When EGFR is  
827 overexpressed in A549 cells there is neither corresponding increase in virus binding nor in  
828 colocalization of viral NA with EGFR. Rather cells overexpressing EGFR shows similar virus  
829 binding pattern as cells with endogenous level of EGFR (bottom panel). Altogether, these  
830 results demonstrate that virus binding is not significantly increased with overexpression of  
831 EGFR, suggesting its poor binding ability with virus. (b) The figure shows A549 cells stained  
832 for host DC-SIGN (green) and influenza NA (red) after 5 minutes of virus binding on them.  
833 The upper panel of the figure shows no trace of virus binding in uninfected cells. The figure  
834 shows few co-localization spots (yellow spots, middle panel) in cells with endogenous level of  
835 DC-SIGN. Also, in lung A549 cells overexpressing DC-SIGN (green) there is no consequent  
836 increase in virus binding (bottom panel, pointed with white arrow) as compared to cells with

837 endogenous level of DC-SIGN (middle panel, pointed with white arrow). Altogether, results  
838 demonstrate that virus binding is not significantly increased with overexpression of DC-SIGN,  
839 implying its poor virus binding ability. (c) A monolayer of A549 cells when stained for  
840 endogenous expression level of host CD66c (green) and influenza NA (red) after 5 minutes (5')  
841 of virus binding on them, showed significant virus binding on cell surface as probed by  
842 influenza neuraminidase NA (red) (middle panel). Cells also showed colocalisation (yellow  
843 spots) between endogenous levels of receptor CD66c (green) with influenza neuraminidase NA  
844 (red). Unbound influenza NA (red) is not easily identified as most of them are seen merged (as  
845 yellow) with CD66c. The upper panel of the figure shows no trace of virus binding in  
846 uninfected cells (UI). Also, in A549 cells overexpressing receptor CD66c, a significant increase  
847 in virus binding and co-localization of CD66c with NA (yellow dots) on the cell surface is  
848 observed (bottom panel) when compared to cells with endogenous level of CD66c (middle  
849 panel). The figure shows receptor CD66c (green) mainly at the periphery of cells interacting  
850 with significant number of NA (yellow after merge, pointed with white arrow). Altogether,  
851 results exhibit that virus binding with CD66c is prominent and significantly increased with  
852 overexpression, highlighting the strong binding ability of receptor CD66c as compared to  
853 EGFR and DC-SIGN.

854

855 **Figure 8: Comparative measurement of viral infection in cells overexpressing CD66c,**  
856 **EGFR and DC-SIGN respectively.** Here CT denotes control A549 cells (untransfected) with  
857 endogenous levels of protein expression; CD66c-OE is A549 cells overexpressing CD66c; DC-  
858 SIGN-OE, A549 cells overexpressing DC-SIGN; EGFR-OE, A549 cells overexpressing EGFR;  
859 UI, uninfected cell groups; 8h, cells harvested after 8 hours of A/PR8/34 influenza virus  
860 infection. (a) The A549 cells overexpressing CD66c (CD66c-OE) demonstrate significantly  
861 increased virus entry as against A549 cells with endogenous levels of CD66c (CT) when  
862 determined by the expression levels of viral protein NP (fourth panel from top). Also, top two

863 panels in figure show that overexpression of CD66c has not affected expression levels of EGFR  
864 and DC-SIGN, and their expression levels remained same as in untransfected A549 cells (top  
865 two panels).  $\beta$ -Actin is loading control. **(b)**: cells overexpressing DC-SIGN (DC-SIGN-OE)  
866 showed a slight increase in virus entry into cells as against A549 cells with endogenous levels  
867 of DC-SIGN (CT), when determined by the level of viral NP protein (fourth panel from top).  
868 More importantly, overexpression of DC-SIGN has not increased expression levels of EGFR  
869 and CD66c, whose levels remained same as in untransfected A549 cells (top and third panel  
870 from top).  $\beta$ -Actin is loading control here. **(c)**: The expression levels of viral NP protein  
871 (fourth panel from top) suggests that overexpression of EGFR in A549 cells (EGFR-OE) does  
872 not result in further increase in virus entry. The virus entry in these cells is same as in A549  
873 cells with endogenous levels of EGFR (CT). Accordingly, overexpression of EGFR does not  
874 increase expression levels of DC-SIGN and CD66c (second and third panel from top).  $\beta$ -Actin  
875 is loading control.

876

877 **Figure 9: siRNA knockdown of CD66c in Huh7.5 cells have not inhibited entry of another**  
878 **non-IAV virus (Hepatitis C virus, HCV).** Here, Si-CT denotes control siRNA treated human  
879 hepatoma cells; Si-CD66c is human hepatoma cells treated with CD66c siRNA. Cells are either  
880 left uninfected (UI) or infected with 0.5 MOI of HCV for 48 hours (48h). Human hepatoma  
881 cells harvested 48 hours post infection is subjected to immunoblotting. The figure shows that  
882 CD66c siRNA treated human hepatoma Huh7.5 cells show reduced expression of CD66c (third  
883 panel from top). However, this siRNA-mediated knockdown of CD66c in Huh7.5 cells does not  
884 inhibit HCV entry as determined by the expression level of HCV viral protein NS3 (fourth  
885 panel from top). Also, Huh7.5 cells knocked down for CD66c expression does not show any  
886 inhibitory effect in the expression levels of EGFR and DC-SIGN (upper two panels).  $\beta$ -Actin is  
887 loading control.

888

889 **Figure S1: PR8 virus pre incubated with purified recombinant CD66c causes lower**  
890 **inflammatory response in mice lung.** Figure shows histopathological analysis of lung tissues  
891 of mice infected with A/PR8/34 influenza virus. Images shown in the figure are lung tissues of  
892 sacrificed animals, preserved in formalin, embedded in paraffin and sectioned into serial 4- $\mu$ m  
893 sections. The figure shows images of infected tissues stained with hematoxylin & eosin dye  
894 (H&E) captured at 20X magnification. The representative images of mice from different  
895 experimental animal groups are — **(a)** the lung tissues from mice infected with A/PR8/34 virus  
896 pre-incubated with CD66c that showed a mild alveolitis and slight hemorrhage (indicated with  
897 arrow). **(b)** H&E stained lung tissues from mice infected with A/PR8/34 virus, showing  
898 significant alveolitis and extensive intra-alveolar hemorrhage (marked by arrow). **(c)** H&E  
899 stained lung tissues from mice infected with A/PR8/34 virus pre-incubated with BSA (as a  
900 mock protein control), showing alveolitis and intra-alveolar hemorrhage (marked by arrow). **(d)**  
901 Lung tissues from uninfected mice showing no sign of alveolitis.

902

903 **Figures**

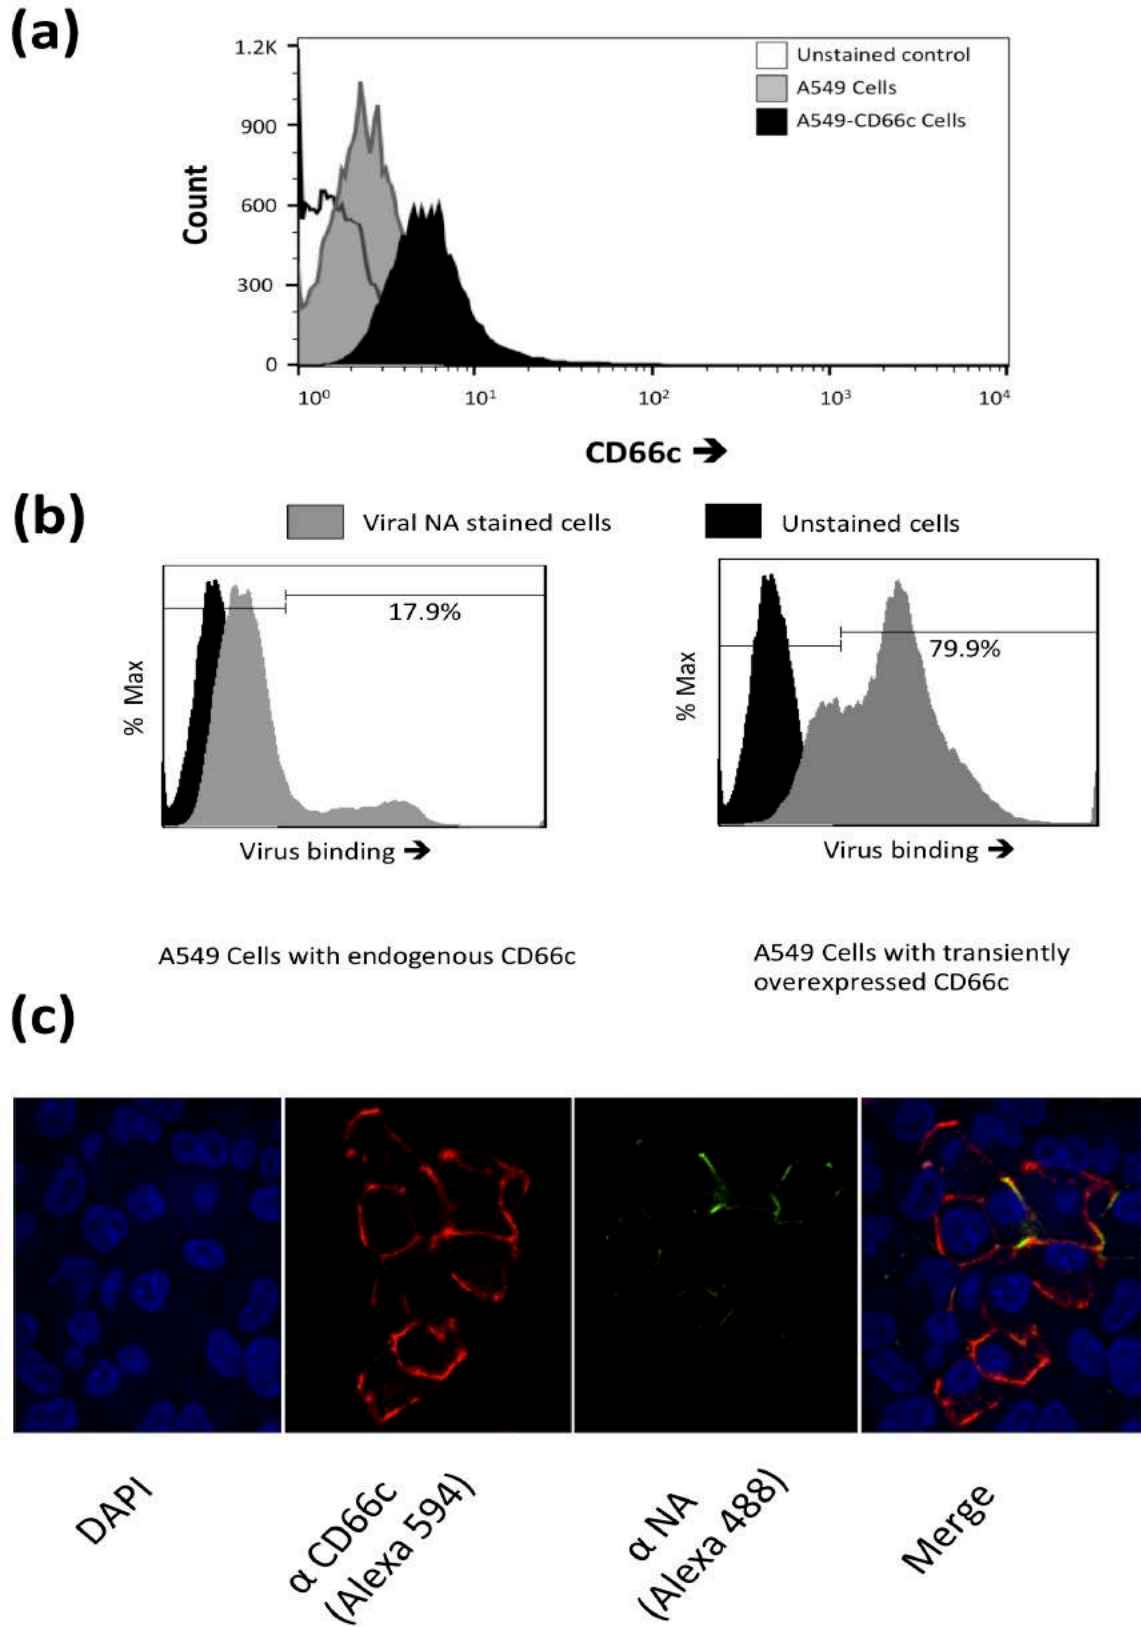

904

905

906

Figure 1

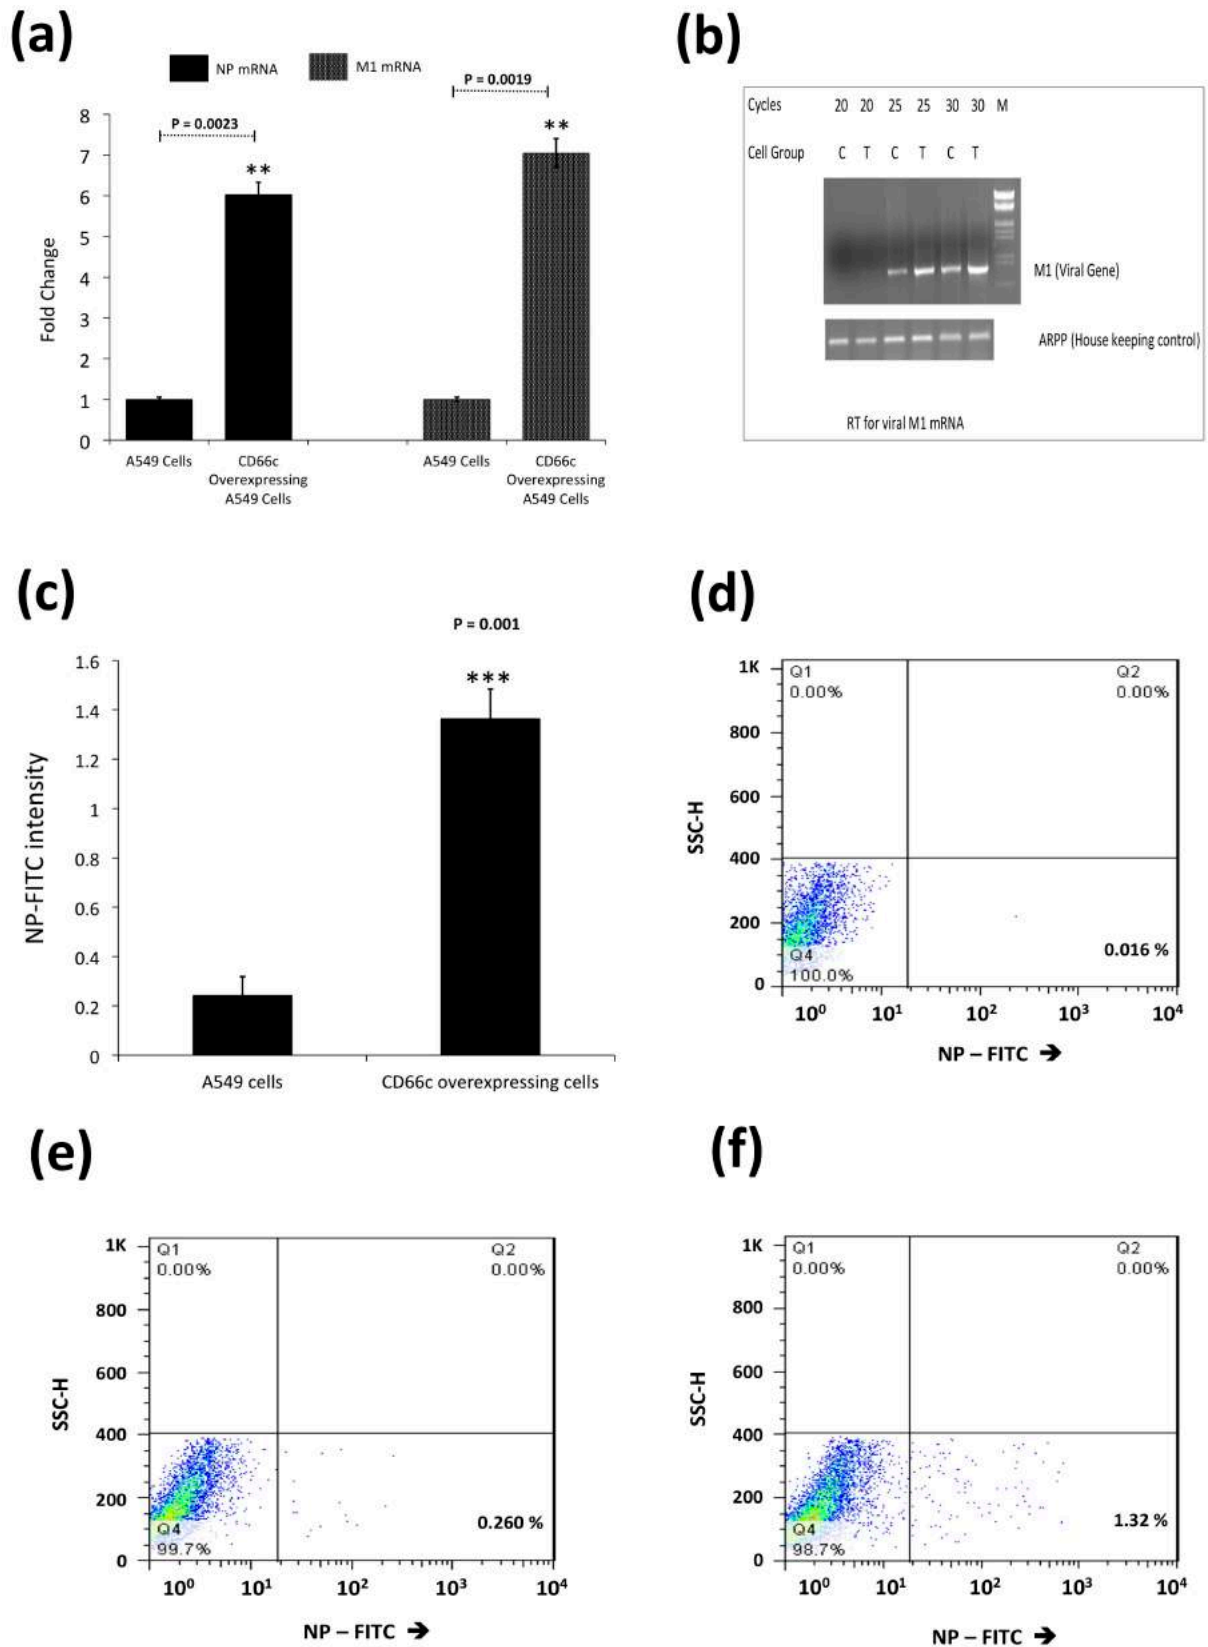

907

908

909

910

Figure 2

911

912

913

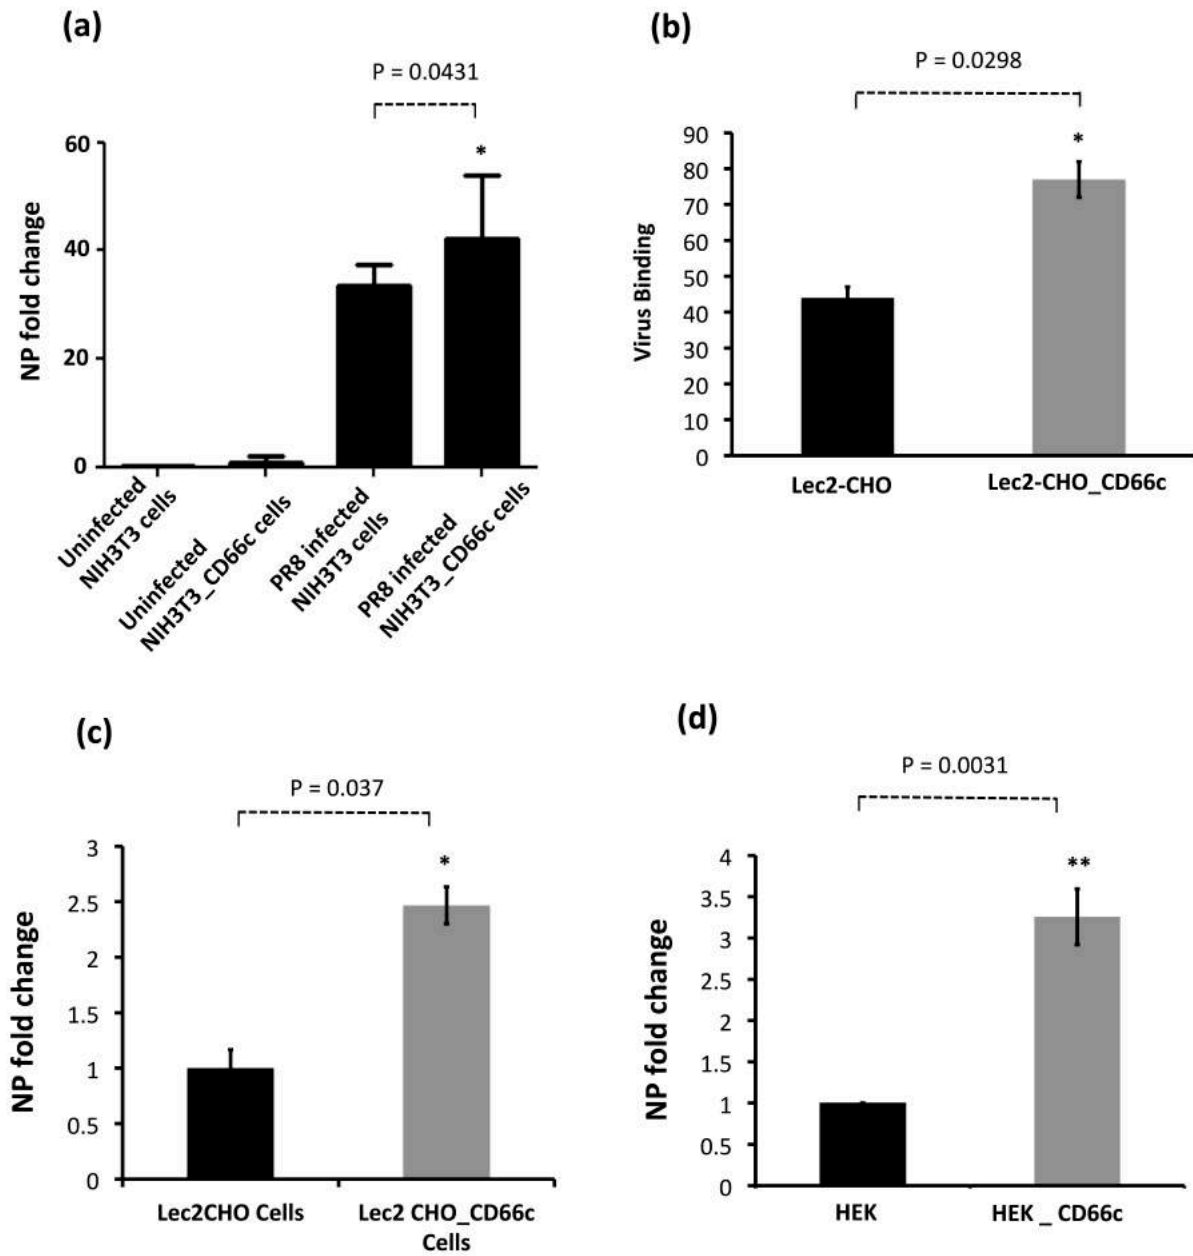

914

915

916

917

918

919

Figure 3

920

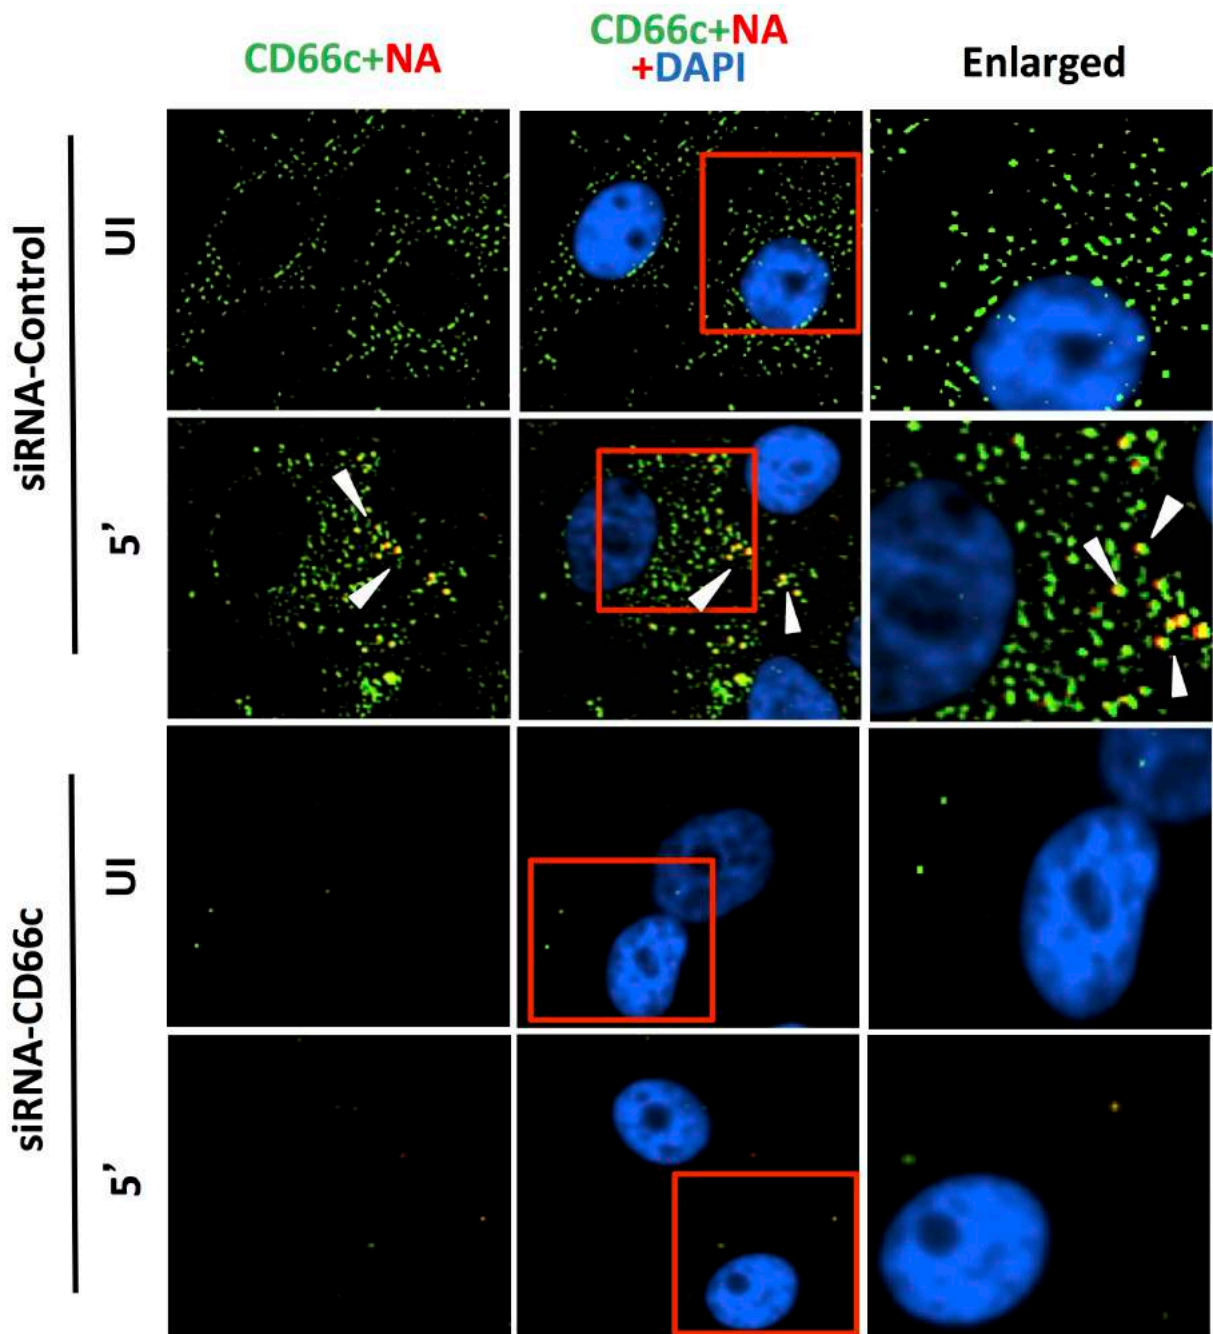

921

922

923

924

925

926

927

Figure 4 (a)



928

### A549 cells (Whole cell lysate)

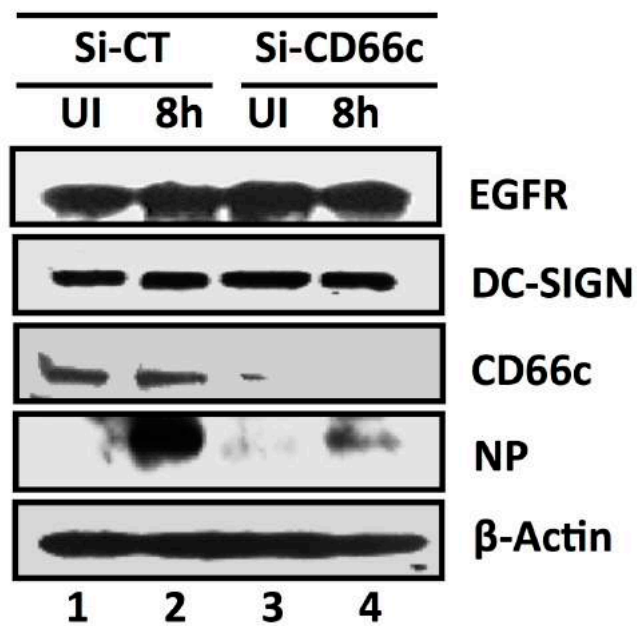

929

930

931

Figure 4 (b)

932

933

934

935

936

937

938

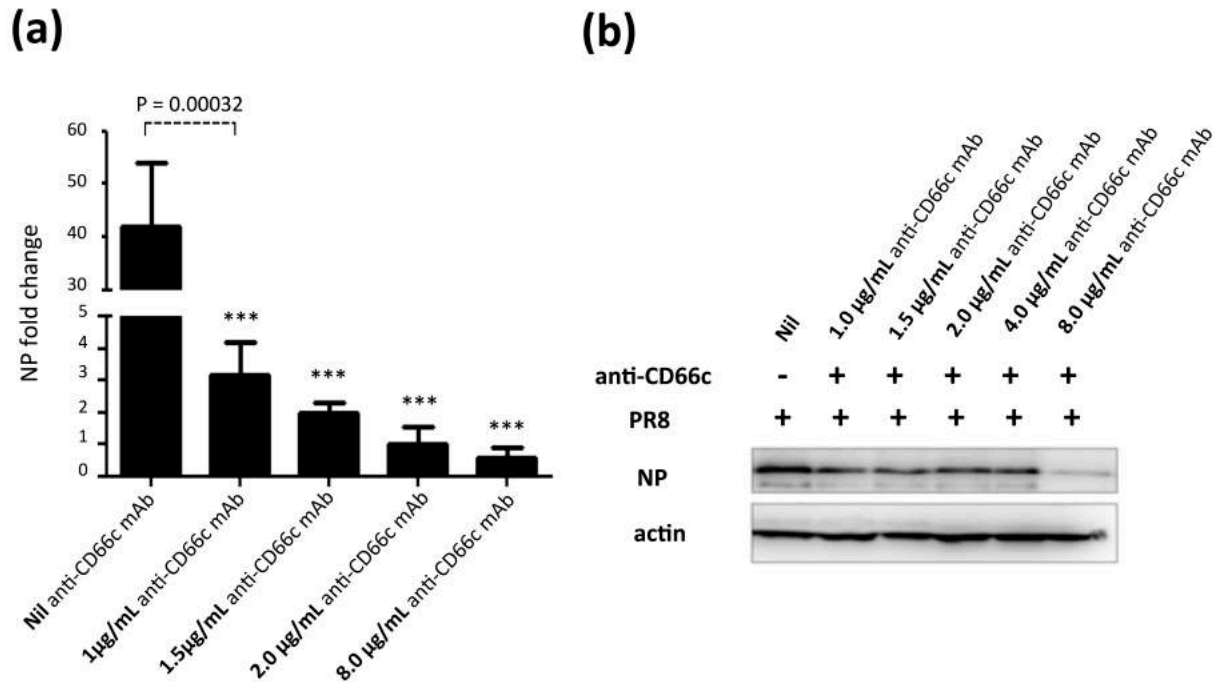

939

940

941

942

943

944

Figure 5

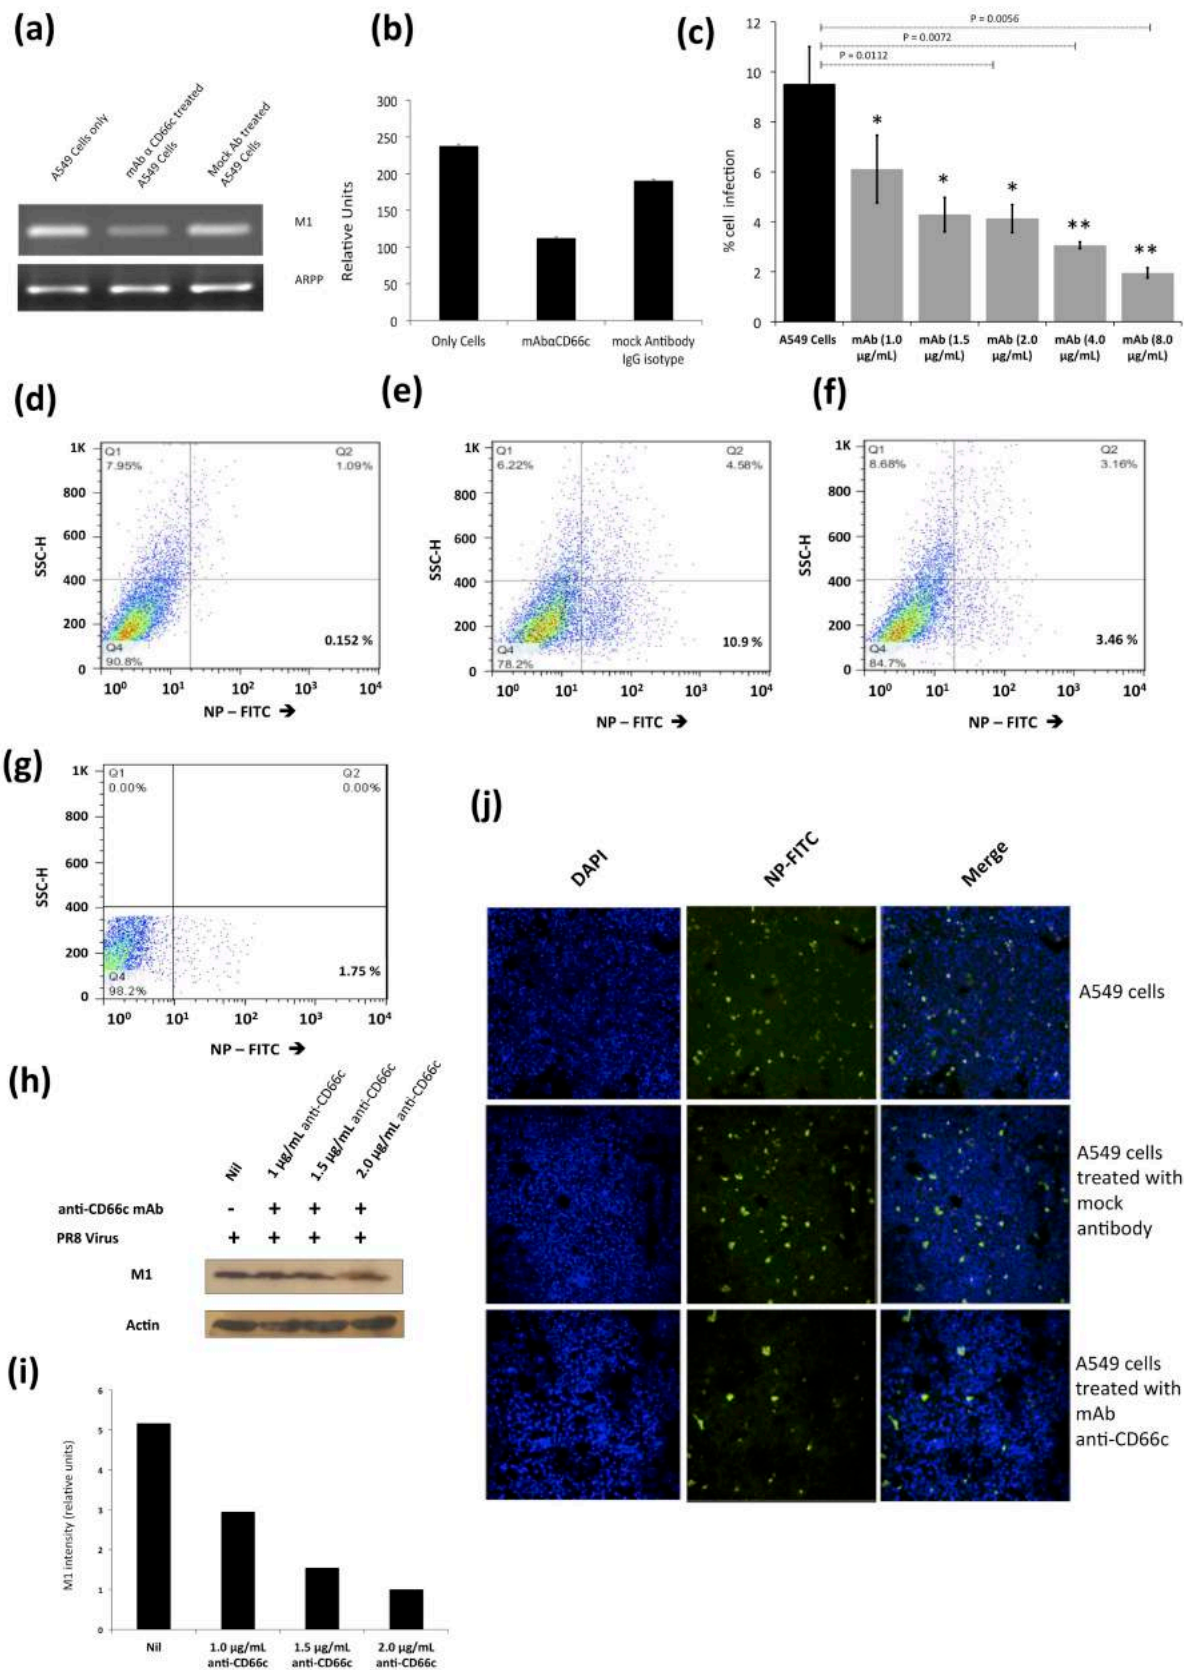

945

946

947

Figure 6

948  
949  
950  
951

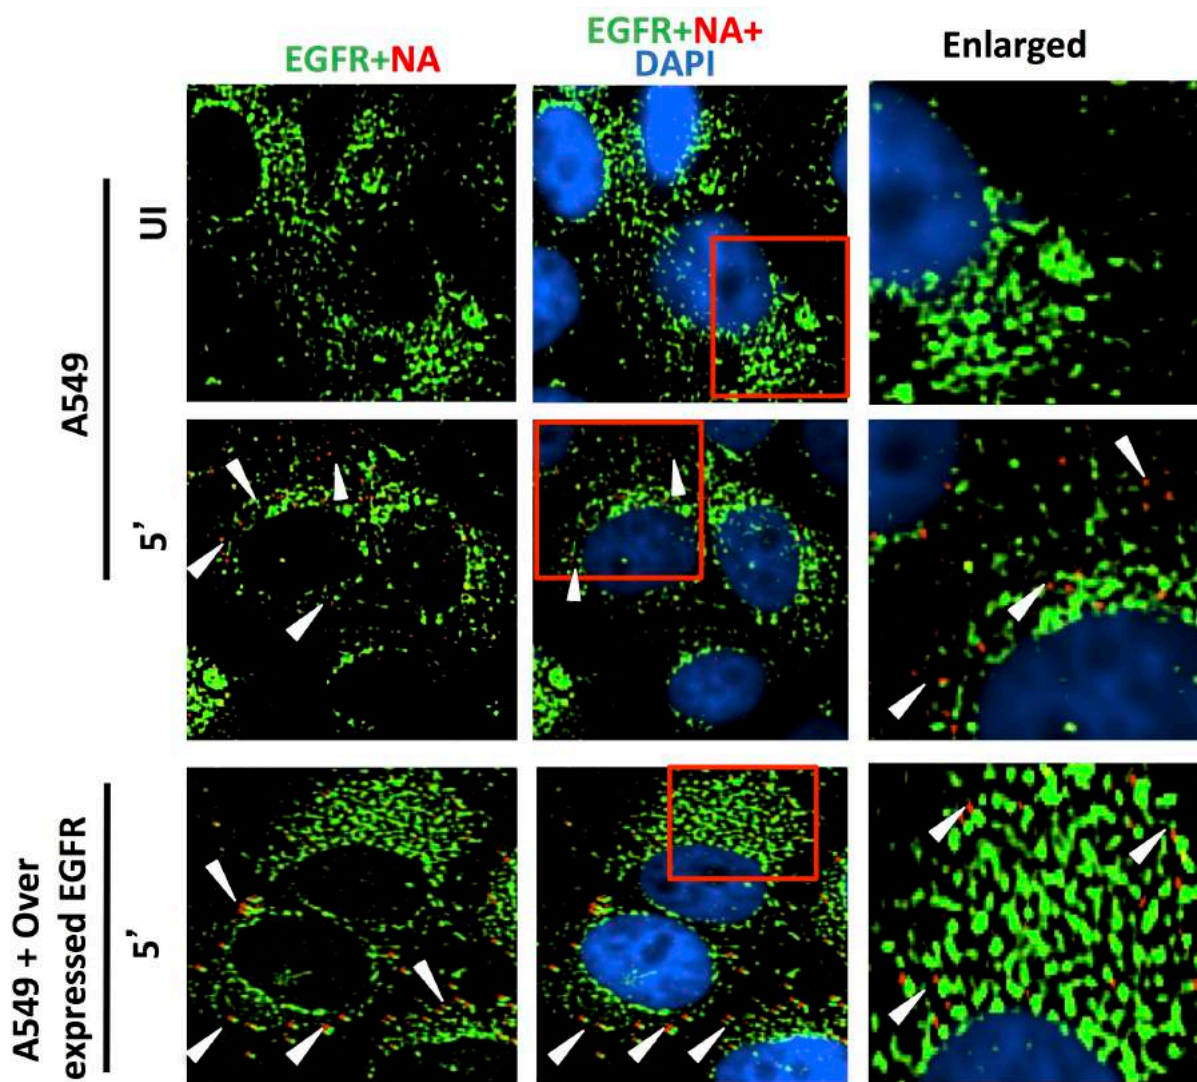

952  
953  
954  
955  
956  
957  
958

Figure 7 (a)

959

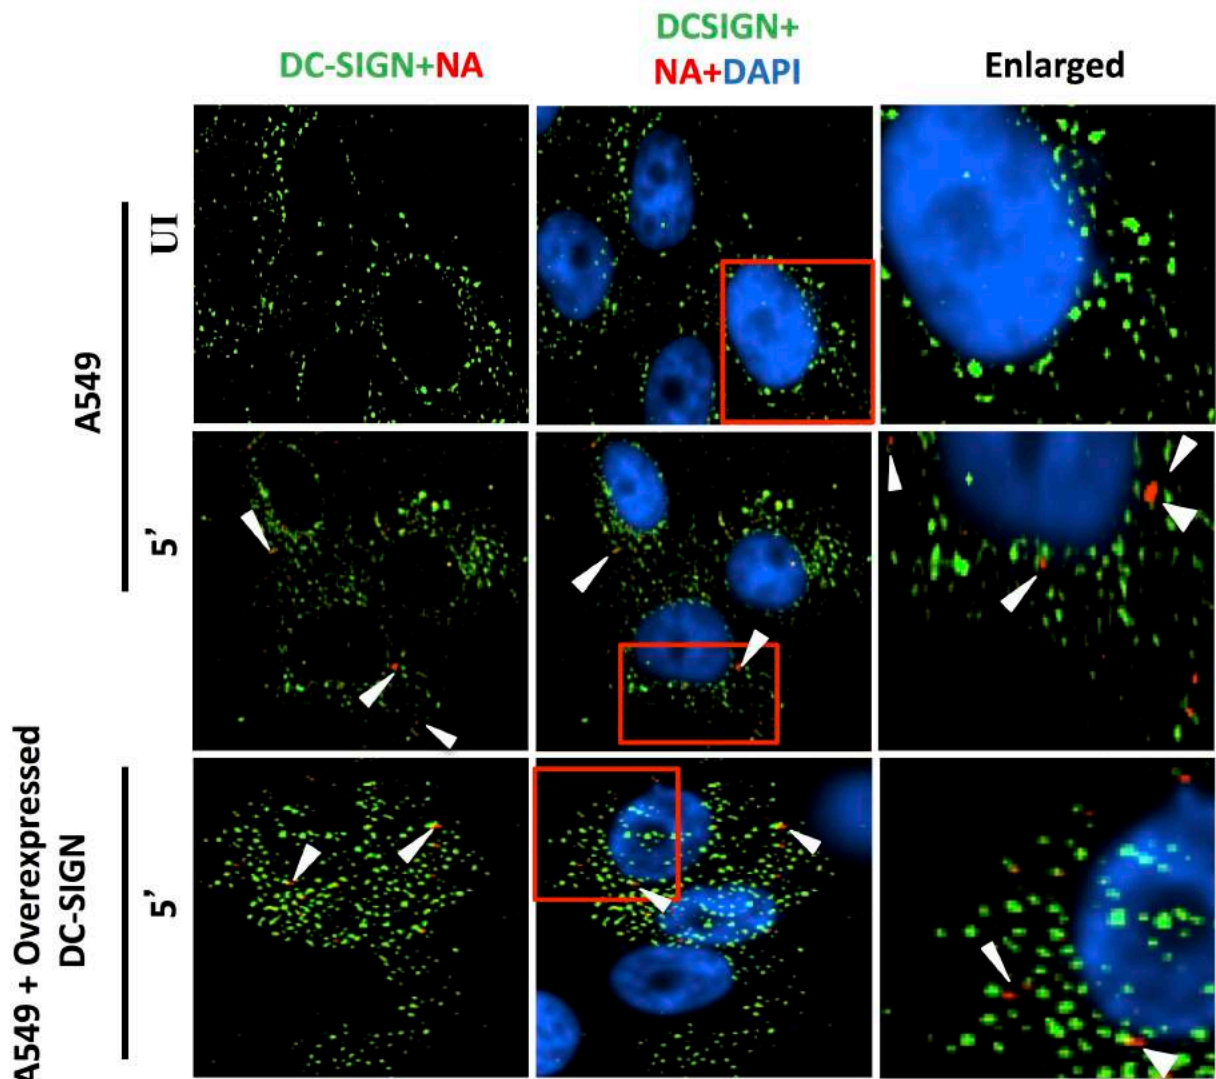

960

961

962

963

Figure 7 (b)

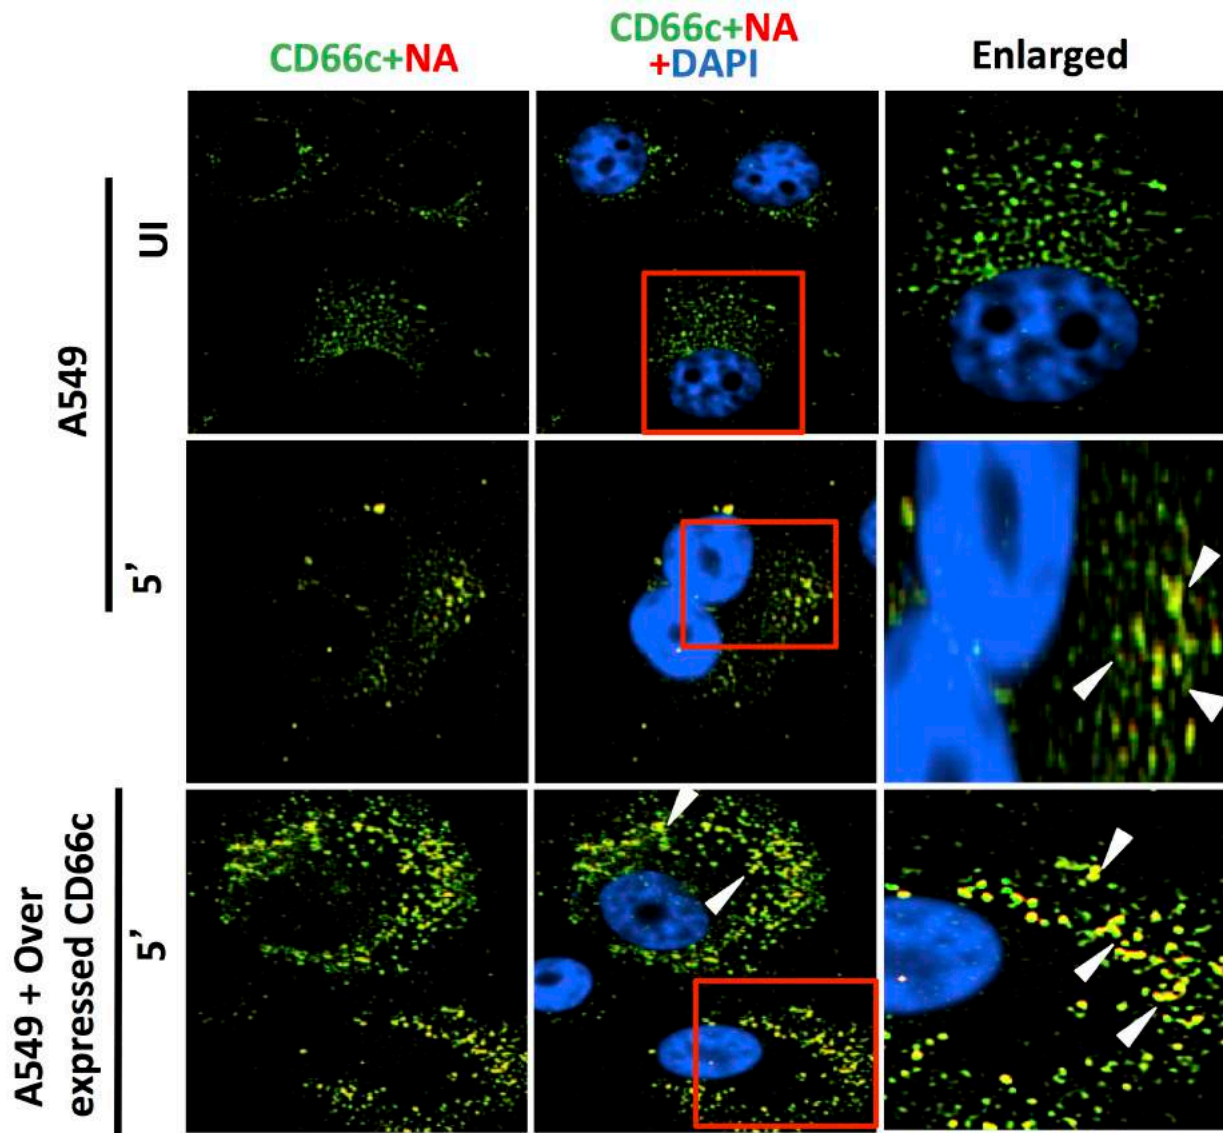

964

965

966

967

968

969

970

971

972

973

Figure 7(c)

974

975

976

977

978

979

980

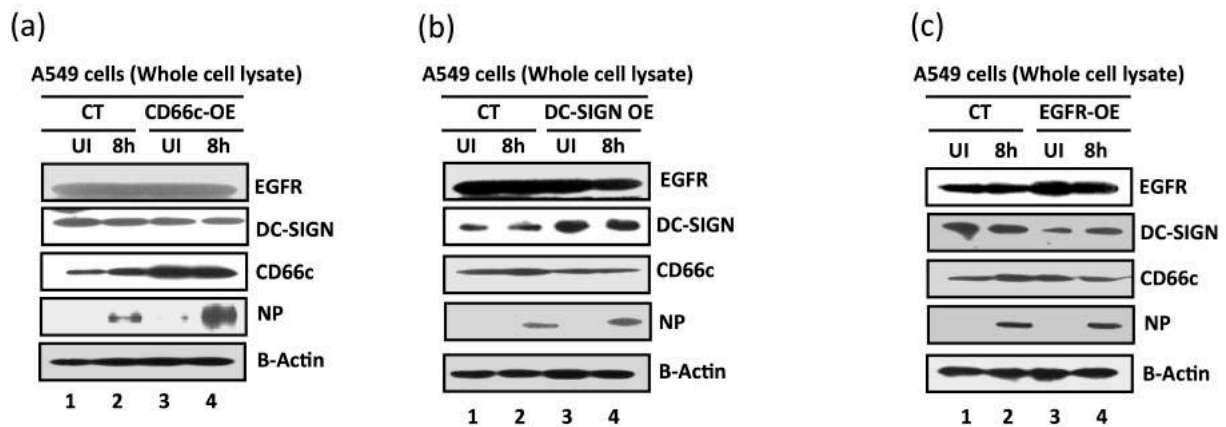

981

982

983

984

**Figure 8**

985

986

987

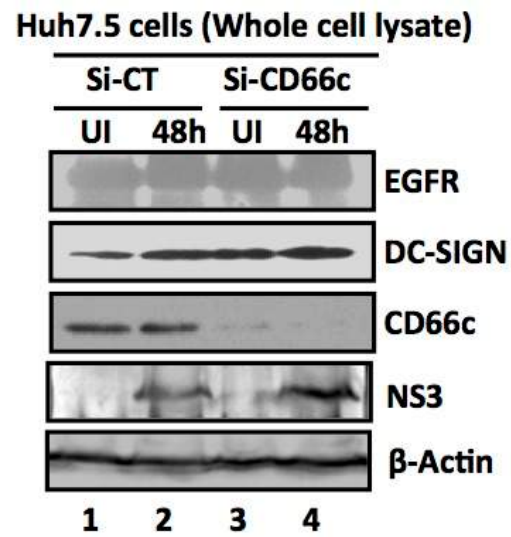

988

989

990

991

**Figure 9**



(a)

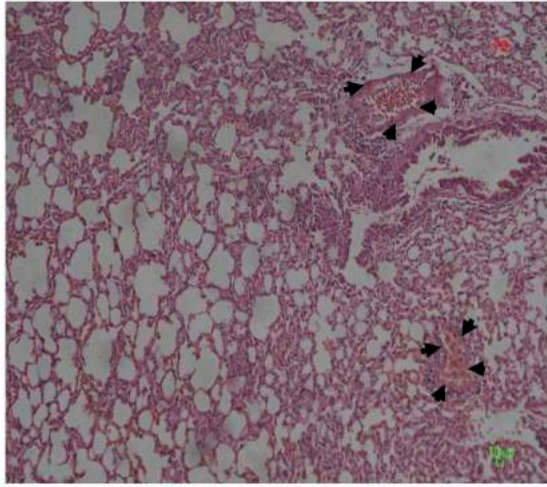

(b)

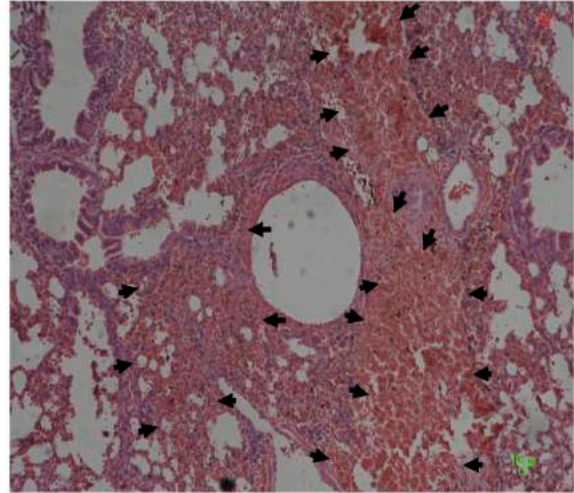

(c)

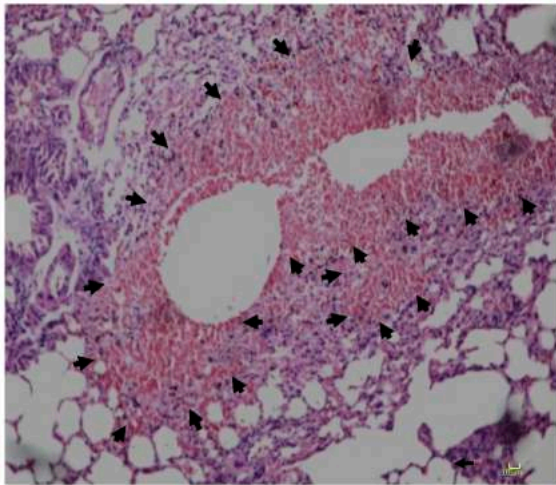

(d)

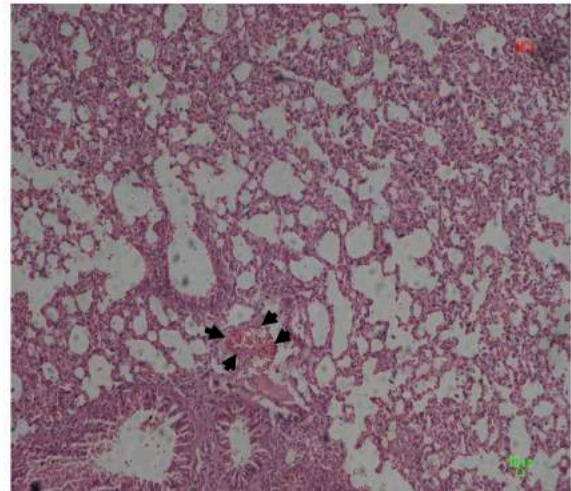

992

993

994

995

996

997

998

999

1000

**Figure S1**

1001 **Graphical abstract**

1002

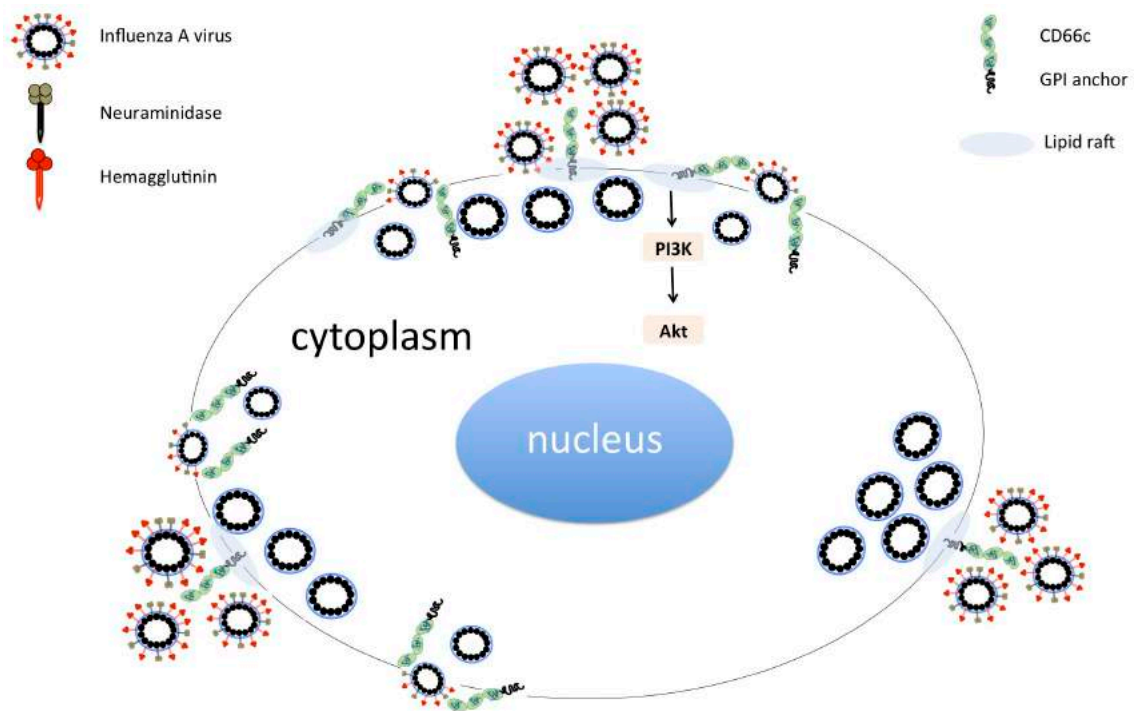

1003

1004
